# Supplementary material for: The association between maternal psychological stress and inflammatory cytokines in allergic young children
Source: PeerJ journal article supplement (doi:10.7717/peerj.1585), 2016-01-18

「皮膚」

37.発疹6ヶ月43.アレルギー性鼻炎

採血1回目採血2回目

| NO | 性   | casecontrol | Asthma<br>diagnosis | symptom | eruption | allergicrhir | age | age2 |
|----|-----|-------------|---------------------|---------|----------|--------------|-----|------|
| NO | sex | casecontrol |                     |         |          |              |     |      |
| 1  | 1   |             | 2                   | 2       | 1        | 2            | 11  |      |
| 2  | 1   |             | 2                   | 1       | 1        | 2            | 18  |      |
| 3  | 2   |             | 2                   | 1       | 1        | 1            | 28  |      |
| 4  | 2   |             | 2                   | 1       | 1        | 2            | 29  |      |
| 5  | 1   |             | 2                   | 1       | 1        | 2            | 22  |      |
| 6  | 1   |             | 2                   | 3       | 2        | 1            | 7   |      |
| 7  | 2   |             | 2                   | 1       | 2        | 2            | 14  | 20   |
| 8  | 2   |             | 2                   | 1       | 2        | 2            | 21  |      |
| 9  | 1   |             | 2                   | 1       | 1        | 1            | 29  |      |
| 10 | 1   |             | 2                   | 2       | 2        | 2            | 36  |      |
| 11 | 1   |             | 2                   | 2       | 2        | 1            | 10  |      |
| 12 | 1   |             | 2                   | 2       | 2        | 2            | 19  |      |
| 13 | 2   | 1           | 1                   | 3       | 1        | 2            | 66  |      |
| 14 | 1   |             | 1                   | 2       | 2        | 2            | 10  |      |
| 15 | 1   | 2           | 2                   | 0       | 2        | 2            | 18  |      |
| 16 | 1   | 1           | 1                   | 1       | 1        | 2            | 35  |      |
| 17 | 1   |             | 2                   | 1       | 1        | 2            | 19  |      |
| 18 | 2   | 1           | 1                   | 3       | 2        | 2            | 31  |      |
| 19 | 2   | 1           | 2                   | 2       | 2        | 2            | 23  |      |
| 20 | 2   | 2           | 2                   | 0       | 2        | 1            | 23  |      |
| 21 | 1   |             | 2                   | 0       | 2        | 2            | 29  |      |
| 22 | 2   | 2           | 2                   | 0       | 2        | 2            | 7   | 12   |
| 23 | 1   |             | 2                   | 0       | 2        | 2            | 25  |      |
| 24 | 2   |             | 2                   | 2       | 1        | 2            | 39  |      |
| 25 | 1   | 1           | 2                   | 2       | 1        | 2            | 11  |      |
| 26 | 1   |             | 2                   | 0       | 1        | 2            | 14  |      |
| 27 | 1   |             | 2                   | 0       | 1        | 2            | 6   | 10   |
| 28 | 1   |             | 2                   | 1       | 2        | 2            | 22  |      |
| 29 | 2   |             | 2                   | 2       | 2        | 2            | 7   |      |
| 30 | 2   | 2           | 2                   | 0       | 2        | 2            | 8   |      |
| 31 | 2   | 2           | 2                   | 0       | 2        | 2            | 38  |      |
| 32 | 1   |             | 2                   | 2       | 2        | 1            | 6   |      |
| 33 | 1   |             | 2                   | 3       | 2        | 1            | 35  |      |
| 34 | 1   | 2           | 2                   | 0       | 2        | 2            | 19  |      |
| 35 | 2   | 2           | 2                   | 0       | 2        | 2            | 12  |      |
| 36 | 1   | 1           | 1                   | 3       | 2        | 2            | 47  |      |
| 37 | 1   |             | 1                   | 0       | 1        | 2            | 15  |      |
| 38 | 2   |             | 2                   | 2       | 1        | 2            | 57  |      |
| 39 | 1   |             | 1                   | 1       | 1        | 1            | 52  |      |
| 40 | 1   |             | 2                   | 2       | 2        | 2            | 6   | 11   |
| 41 | 2   |             | 1                   | 0       | 2        | 2            | 14  |      |
| 42 | 2   | 2           | 2                   | 0       | 1        | 2            | 6   |      |
| 43 | 2   | 2           | 2                   | 0       | 2        | 2            | 9   | 16   |
| 44 | 2   | 2           | 2                   | 0       | 2        | 2            | 27  |      |
| 45 | 2   |             | 2                   | 3       | 2        | 2            | 28  |      |
| 46 | 2   | 2           | 2                   | 0       | 1        | 2            | 13  |      |
| 47 | 1   |             | 2                   | 2       | 2        | 2            | 3   | 6    |
| 48 | 2   |             | 1                   | 2       | 1        | 1            | 77  |      |
| 49 | 2   | 1           | 2                   | 2       | 1        | 2            | 11  | 19   |
| 50 | 1   | 2           | 2                   | 0       | 2        | 1            | 39  |      |
| 51 | 2   |             | 2                   | 3       | 2        | 2            | 21  |      |
| 52 | 2   | 2           | 2                   | 0       | 2        | 2            | 28  |      |
| 53 | 1   | 2           | 2                   | 0       | 2        | 1            | 18  |      |
| 54 | 1   |             | 2                   | 2       | 2        | 2            | 13  |      |
| 55 | 2   | 2           | 2                   | 0       | 2        | 2            | 6   |      |

|     |   |   |   |   |
|-----|---|---|---|---|
| 56  | 1 | 2 | 2 | 0 |
| 57  | 1 |   | 2 | 1 |
| 58  | 1 |   | 2 | 3 |
| 59  | 1 |   | 1 | 3 |
| 60  | 2 | 2 | 2 | 0 |
| 61  | 2 |   | 2 | 1 |
| 62  | 1 | 2 | 2 | 0 |
| 63  | 2 |   | 2 | 3 |
| 64  | 1 |   | 2 | 1 |
| 65  | 1 | 2 | 2 | 0 |
| 66  | 1 |   | 1 | 3 |
| 67  | 1 |   | 2 | 2 |
| 68  | 2 | 2 | 2 | 0 |
| 69  | 1 |   | 2 | 1 |
| 70  | 2 | 2 | 2 | 0 |
| 71  | 1 |   | 2 | 2 |
| 72  | 1 |   | 2 | 3 |
| 73  | 1 | 2 | 2 | 0 |
| 74  | 2 |   | 2 | 3 |
| 75  | 1 |   | 2 | 1 |
| 76  | 2 | 1 | 1 | 3 |
| 77  | 1 | 2 | 2 | 1 |
| 78  | 1 |   | 2 | 3 |
| 79  | 1 |   | 1 | 0 |
| 80  | 2 | 2 | 2 | 1 |
| 81  | 2 |   | 2 | 1 |
| 82  | 1 |   | 2 | 1 |
| 83  | 1 | 1 | 2 | 3 |
| 84  | 1 |   | 1 | 3 |
| 85  | 2 | 2 | 2 | 0 |
| 86  | 2 | 2 | 2 | 0 |
| 87  | 2 | 2 | 2 | 0 |
| 88  | 2 |   | 1 | 1 |
| 89  | 1 | 2 | 2 | 0 |
| 90  | 1 | 2 | 2 | 0 |
| 91  | 1 | 2 | 2 | 0 |
| 92  | 2 | 2 | 2 | 1 |
| 93  | 1 |   | 2 | 2 |
| 94  | 1 | 1 | 1 | 3 |
| 95  | 1 |   | 1 | 1 |
| 96  | 1 | 2 | 2 | 0 |
| 97  | 1 | 2 | 2 | 1 |
| 98  | 2 |   | 2 | 1 |
| 99  | 2 |   | 2 | 1 |
| 100 | 2 |   | 1 | 1 |
| 101 | 1 |   | 2 | 1 |
| 102 | 2 | 2 | 2 | 0 |
| 103 | 2 | 1 | 1 | 3 |
| 104 | 1 |   | 2 | 3 |
| 105 | 1 | 2 | 2 | 0 |
| 106 | 2 | 2 | 2 | 0 |
| 107 | 1 | 2 | 2 | 0 |
| 108 | 1 | 1 | 1 | 3 |
| 109 | 1 | 2 | 2 | 0 |
| 110 | 1 | 1 | 1 | 3 |
| 111 | 2 | 1 | 1 | 3 |
| 112 | 2 |   | 2 | 1 |
| 113 | 1 | 1 | 1 | 3 |
| 114 | 2 | 2 | 2 | 0 |

|   |   |    |    |
|---|---|----|----|
| 2 | 2 | 6  |    |
| 1 | 2 | 15 |    |
| 2 | 2 | 9  |    |
| 2 | 2 | 33 |    |
| 2 | 2 | 12 | 20 |
| 1 | 2 | 29 |    |
| 2 | 2 | 21 |    |
| 1 | 2 | 26 |    |
| 2 | 2 | 66 |    |
| 1 | 2 | 40 |    |
| 1 | 1 | 13 |    |
| 2 | 2 | 8  |    |
| 1 | 2 | 30 |    |
| 2 | 2 | 6  |    |
| 2 | 2 | 5  | 9  |
| 2 | 2 | 72 |    |
| 2 | 2 | 11 |    |
| 2 | 2 | 7  |    |
| 1 | 2 | 44 | 51 |
| 2 | 2 | 13 |    |
| 2 | 2 | 29 |    |
| 1 | 2 | 39 |    |
| 1 | 2 | 8  |    |
| 2 | 2 | 40 | 48 |
| 2 | 2 | 5  | 12 |
| 2 | 2 | 5  |    |
| 2 | 2 | 30 |    |
| 2 | 2 | 30 |    |
| 1 | 1 | 27 |    |
| 2 | 2 | 26 |    |
| 2 | 2 | 6  |    |
| 2 | 2 | 6  | 12 |
| 2 | 1 | 17 |    |
| 1 | 2 | 6  |    |
| 2 | 2 | 7  |    |
| 2 | 2 | 6  |    |
| 2 | 2 | 39 |    |
| 2 | 2 | 15 |    |
| 1 | 1 | 15 | 21 |
| 1 | 2 | 18 |    |
| 2 | 2 | 3  | 9  |
| 2 | 1 | 12 |    |
| 1 | 1 | 8  |    |
| 1 | 2 | 36 |    |
| 2 | 2 | 14 |    |
| 2 | 2 | 6  |    |
| 1 | 2 | 13 |    |
| 2 | 2 | 29 |    |
| 2 | 2 | 6  | 10 |
| 2 | 2 | 6  |    |
| 2 | 2 | 6  |    |
| 1 | 2 | 16 | 22 |
| 2 | 1 | 29 | 36 |
| 2 | 2 | 3  |    |
| 2 | 2 | 11 |    |
| 1 | 2 | 37 |    |
| 2 | 2 | 8  |    |
| 1 | 1 | 48 |    |
| 2 | 2 | 11 |    |

|     |   |   |   |   |
|-----|---|---|---|---|
| 115 | 2 |   | 1 | 0 |
| 116 | 1 | 2 | 2 | 0 |
| 117 | 1 | 1 | 2 | 2 |
| 118 | 1 | 2 | 2 | 0 |
| 119 | 1 | 2 | 2 | 0 |
| 120 | 1 | 2 | 2 | 0 |
| 121 | 1 | 1 | 1 | 3 |
| 122 | 1 |   | 1 | 3 |
| 123 | 2 |   | 2 | 1 |
| 124 | 1 |   | 2 | 1 |
| 125 | 2 | 2 | 2 | 0 |
| 126 | 2 | 2 | 2 | 0 |
| 127 | 1 |   | 2 | 2 |
| 128 | 2 | 1 | 1 | 3 |
| 129 | 1 |   | 2 | 3 |
| 130 | 1 |   | 1 | 3 |
| 131 | 1 |   | 1 | 1 |
| 132 | 1 |   | 2 | 3 |
| 133 | 1 |   | 2 | 1 |
| 134 | 1 |   | 2 | 1 |
| 135 | 1 | 1 | 1 | 3 |
| 136 | 1 | 1 | 1 | 3 |
| 137 | 2 | 2 | 2 | 0 |
| 138 | 1 |   | 1 | 2 |
| 139 | 2 |   | 2 | 1 |
| 140 | 1 | 2 | 2 | 0 |
| 141 | 2 |   | 2 | 2 |
| 142 | 1 | 2 | 2 | 0 |
| 143 | 1 |   | 2 | 1 |
| 144 | 1 |   | 2 | 1 |
| 145 | 2 |   | 2 | 1 |
| 146 | 2 |   | 1 | 1 |
| 147 | 1 |   | 2 | 3 |
| 148 | 1 |   | 1 | 3 |
| 149 | 2 | 2 | 2 | 0 |
| 150 | 2 | 1 | 1 | 1 |
| 151 | 2 | 2 | 2 | 0 |
| 152 | 2 | 2 | 2 | 0 |
| 153 | 2 |   | 2 | 3 |
| 154 | 2 |   | 2 | 3 |
| 155 | 1 | 2 | 2 | 0 |
| 156 | 2 |   | 2 | 2 |
| 157 | 2 | 2 | 2 | 0 |
| 158 | 2 | 2 | 2 | 0 |
| 159 | 1 |   | 1 | 3 |
| 160 | 1 |   | 1 | 3 |
| 161 | 2 | 2 | 2 | 0 |
| 162 | 2 | 2 | 2 | 0 |
| 163 | 2 |   | 1 | 3 |
| 164 | 1 | 2 | 2 | 0 |
| 165 | 2 | 2 | 2 | 0 |
| 166 | 2 | 2 | 2 | 0 |
| 167 | 2 |   | 2 | 2 |
| 168 | 2 | 1 | 1 | 3 |
| 169 | 2 | 2 | 2 | 0 |
| 170 | 1 |   | 2 | 3 |
| 171 | 1 | 2 | 2 | 0 |
| 172 | 2 | 2 | 2 | 1 |
| 173 | 1 | 2 | 2 | 0 |

|   |   |    |    |
|---|---|----|----|
| 2 | 2 | 14 |    |
| 1 | 2 | 10 | 16 |
| 1 | 1 | 7  |    |
| 1 | 2 | 29 |    |
| 1 | 2 | 7  |    |
| 2 | 2 | 6  |    |
| 1 | 1 | 35 | 43 |
| 1 | 2 | 9  |    |
| 2 | 2 | 7  |    |
| 1 | 2 | 13 |    |
| 2 | 2 | 9  |    |
| 1 | 2 | 7  | 11 |
| 1 | 2 | 16 |    |
| 1 | 1 | 31 |    |
| 2 | 2 | 17 |    |
| 1 | 2 | 31 |    |
| 1 | 2 | 8  |    |
| 2 | 2 | 20 |    |
| 2 | 2 | 6  |    |
| 2 | 2 | 6  |    |
| 1 | 2 | 19 |    |
| 2 | 2 | 24 |    |
| 1 | 2 | 7  |    |
| 1 | 2 | 19 |    |
| 1 | 2 | 7  |    |
| 1 | 2 | 14 |    |
| 1 | 2 | 7  | 12 |
| 2 | 2 | 8  |    |
| 2 | 2 | 23 |    |
| 2 | 2 | 12 |    |
| 2 | 2 | 23 |    |
| 1 | 2 | 30 |    |
| 2 | 2 | 10 |    |
| 1 | 1 | 72 |    |
| 2 | 2 | 6  | 10 |
| 2 | 2 | 23 | 29 |
| 2 | 2 | 6  |    |
| 2 | 2 | 7  | 12 |
| 1 | 1 | 10 |    |
| 2 | 2 | 22 |    |
| 1 | 2 | 7  | 12 |
| 2 | 2 | 10 |    |
| 2 | 2 | 13 |    |
| 1 | 2 | 14 |    |
| 1 | 2 | 9  | 15 |
| 2 | 2 | 47 |    |
| 2 | 2 | 7  | 12 |
| 2 | 2 | 18 |    |
| 1 | 2 | 16 |    |
| 1 | 2 | 22 |    |
| 1 | 2 | 48 |    |
| 1 | 2 | 7  |    |
| 2 | 2 | 17 | 25 |
| 1 | 2 | 32 |    |
| 1 | 2 | 27 |    |

|     |   |   |   |   |   |   |      |
|-----|---|---|---|---|---|---|------|
| 174 | 2 |   | 2 | 1 | 1 | 2 | 60   |
| 175 | 1 | 2 | 2 | 0 | 1 | 2 | 72   |
| 176 | 2 |   | 1 | 1 | 2 | 2 | 24   |
| 177 | 2 | 2 | 2 | 0 | 2 | 2 | 15   |
| 178 | 2 | 1 | 1 | 3 | 2 | 2 | 28   |
| 179 | 1 | 1 | 1 | 3 | 1 | 1 | 11   |
| 180 | 1 | 2 | 2 | 0 | 1 | 1 | 36   |
| 181 | 1 | 2 | 2 | 0 | 2 | 2 | 8    |
| 182 | 2 | 1 | 1 | 3 | 2 | 1 | 48   |
| 183 | 1 | 1 | 2 | 3 | 2 | 1 | 24   |
| 184 | 2 | 2 | 2 | 0 | 1 | 2 | 60   |
| 185 | 2 | 1 | 1 | 3 | 1 | 2 | 36   |
| 186 | 1 | 2 | 2 | 0 | 2 | 2 | 11   |
| 187 | 1 |   | 2 | 1 | 1 | 2 | 9    |
| 188 | 1 | 2 | 2 | 0 | 1 | 2 | 6 10 |
| 189 | 2 | 2 | 2 | 0 | 2 | 2 | 7    |
| 190 | 2 | 2 | 2 | 0 | 2 | 2 | 15   |
| 191 | 1 | 1 | 2 | 2 | 1 | 2 | 12   |
| 192 | 2 | 2 | 2 | 0 | 1 | 2 | 9    |
| 193 | 1 | 2 | 2 | 0 | 2 | 2 | 7    |
| 194 | 2 | 2 | 2 | 0 | 2 | 2 | 9    |
| 195 | 1 | 1 | 1 | 3 | 2 | 2 | 9    |
| 196 | 2 |   | 1 | 3 | 2 | 2 | 29   |
| 197 | 1 | 2 | 2 | 0 | 2 | 2 | 21   |
| 198 | 1 | 2 | 2 | 0 | 2 | 2 | 21   |
| 199 | 1 | 2 | 2 | 0 | 2 | 2 | 10   |
| 200 | 1 |   | 2 | 2 | 1 | 2 | 6    |
| 201 | 2 | 2 | 2 | 0 | 2 | 2 | 11   |
| 202 | 2 | 1 | 1 | 3 | 2 | 2 | 19   |
| 203 |   |   |   |   |   |   |      |
| 204 |   |   |   |   |   |   |      |
| 205 |   |   |   |   |   |   |      |
| 206 |   |   |   |   |   |   |      |
| 207 |   |   |   |   |   |   |      |
| 208 |   |   |   |   |   |   |      |
| 209 |   |   |   |   |   |   |      |
| 210 |   |   |   |   |   |   |      |
| 211 |   |   |   |   |   |   |      |
| 212 |   |   |   |   |   |   |      |
| 213 |   |   |   |   |   |   |      |
| 214 |   |   |   |   |   |   |      |
| 215 |   |   |   |   |   |   |      |
| 216 |   |   |   |   |   |   |      |
| 217 |   |   |   |   |   |   |      |

## 採血3回目RAST陽性授乳形態 兄弟番目

| age3 | rast1 | agenc | milk | brother | IL22     | IL10     | IL8      | IL6      | cesd | cesd |
|------|-------|-------|------|---------|----------|----------|----------|----------|------|------|
|      | 1     |       | 2    | 2       | 27.85981 | 3.577669 | 0.238697 | 3.241829 |      |      |
|      | 3     |       | 2    | 1       | 8.316953 | 5.023734 | 0.729504 | 4.128119 |      |      |
|      | 1     |       | 2    | 2       | 30.80245 | 1.09228  | 0.742025 | 1.639479 |      |      |
|      | 1     |       | 2    | 1       | 85.38692 | 2.18052  | 1.596516 | 1.001957 |      | 3    |
|      | 2     |       | 1    | 1       | 8.255703 | 0.774164 | 1.894218 | 0.870143 |      | 7    |
|      | 0     |       | 1    | 1       | 8.537947 | 1.530748 | 0.757077 | 0.516847 |      | 12   |
| 26   | 1     |       | 1    | 1       | 11.62147 | 1.588605 | 0.003132 | 1.229889 |      | 12   |
|      | 0     |       | 1    | 2       | 8.401918 | 2.933393 | 0.30411  | 0.630665 |      | 3    |
|      | 2     |       | 2    | 1       | 2.624194 | 2.718898 | 0.152448 | 0.412258 |      | 12   |
|      | 0     |       | 2    | 2       | 5.706536 | 1.551143 | 2.738117 | 0.621161 |      |      |
|      | 0     |       | 1    | 2       | 1.239717 | 1.859421 | 1.424506 | 3.055403 |      |      |
|      | 0     |       | 3    | 3       | 1.018813 | 0.657516 | 0.451177 | 0.57345  |      | 18   |
|      | 0     |       | 2    | 1       | 9.580591 | 0.54317  | 3.681722 | 0.301421 |      | 5    |
|      | 2     |       | 1    | 2       | 67.53521 | 2.542656 | 0.892406 | 1.73323  |      | 11   |
|      | 0     |       | 2    | 1       | 1        | 1        | 1        | 1        |      | 11   |
|      | 3     |       | 2    | 1       | 53.4746  | 2.57703  | 3.471141 | 0.669084 |      | 9    |
|      | 0     |       | 2    | 2       | 64.34709 | 2.075939 | 1.244957 | 0.702397 |      | 15   |
|      | 2     |       | 2    | 2       | 3.525004 | 4.061677 | 0.255241 | 1.307807 |      | 9    |
|      | 0     |       | 1    | 2       | 1.33476  | 3.223907 | 1.516128 | 0.521241 |      | 10   |
|      | 0     |       | 1    | 4       |          |          |          |          |      | 10   |
|      | 1     |       | 1    | 1       | 2.576717 | 1.00382  | 0.965464 | 0.271981 |      | 12   |
|      | 0     |       | 1    | 2       | 3.441244 | 2.529015 | 1.03453  | 0.445373 |      | 12   |
|      | 1     |       | 3    | 1       | 35.25792 | 3.027941 | 1.165801 | 0.996731 |      | 16   |
|      | 1     |       | 2    | 1       | 4.409525 | 0.374065 | 1.811012 | 0.338879 |      | 13   |
|      | 0     |       | 2    | 2       | 24.18404 | 1.640635 | 0.751538 | 0.538453 |      |      |
|      | 0     |       | 3    | 1       | 5.099383 | 1.775557 | 1.054499 | 0.4478   |      | 14   |
|      | 1     |       | 1    | 1.0     | 2.83766  | 0.836573 | 0.775835 | 1.015496 |      | 9    |
|      | 1     |       | 2    | 1       | 5.433217 | 1.678354 | 0.050897 | 0.291601 |      |      |
|      | 0     |       | 2    | 3       | 37.06203 | 1.288449 | 0.429362 | 0.407735 |      |      |
|      | 0     |       | 2    | 2       | 82.53564 | 1.528109 | 2.062374 | 0.752629 |      | 2    |
|      | 0     |       | 2    | 1       | 0.945983 | 1.531657 | 2.403065 | 0.776668 |      | 0    |
|      | 0     |       | 2    | 2       | 5.078493 | 7.390088 | 0.319579 | 0.65196  |      |      |
|      | 0     |       | 2    | 1       | 21.68801 | 0.689877 | 1.305328 | 0.398735 |      | 13   |
|      | 1     |       | 2    | 1       | 59.17724 | 3.103257 | 0.696104 | 0.62682  |      | 9    |
|      | 0     |       | 2    | 1       | 3.899397 | 1.933719 | 0.691599 | 0.564198 |      | 5    |
|      | 3     |       | 1    | 3       | 1.080785 | 1.844318 | 0.488967 | 0.765297 |      |      |
|      | 1     |       | 2    | 3       | 2.53142  | 1.891568 | 3.026708 | 0.505224 |      | 6    |
|      | 0     |       | 1    | 3       | 71.30623 | 2.734481 | 0.096012 | 2.010121 |      | 0    |
|      | 0     |       | 3    | 1       | 104.1546 | 1.010208 | 0.769706 | 0.237303 |      | 7    |
| 17   | 1     |       | 2    | 2       | 4.991216 | 2.090915 | 2.108022 | 1.292535 |      | 4    |
|      | 0     |       | 3    | 2       | 21.85781 | 18.90378 | 3.278027 | 0.954047 |      | 16   |
|      | 1     |       | 1    | 1       | 1.581631 | 1.550847 | 1.728447 | 0.418288 |      | 9    |
|      | 0     |       | 2    | 1       | 2.48217  | 1.122818 | 0.951141 | 1.719267 |      | 9    |
|      | 0     |       | 1    | 1       | 1.029841 | 4.131466 | 0.54695  | 0.354946 |      | 5    |
|      | 0     |       | 2    | 2       | 3018.416 | 0.416978 | 0.021637 | 18.04647 |      | 14   |
|      | 0     |       | 2    | 2       | 56.18774 | 1.323122 | 0.634621 | 2.248083 |      | 20   |
|      | 0     |       | 1    | 2       | 120.6034 | 1.347555 | 1.552677 | 1.600605 |      | 19   |
|      | 0     |       | 2    | 1       |          |          |          |          |      | 3    |
|      | 0     |       | 1    | 3       | 53.01115 | 2.166795 | 1.705025 | 0.900324 |      | 1    |
|      | 1     |       | 2    | 1       | 67.37157 | 3.459848 | 1.4549   | 3.760466 |      | 6    |
|      | 0     |       | 1    | 1       | 53.69854 | 1.557616 | 4.028664 | 1.900223 |      |      |
|      | 1     |       | 2    | 1       | 75.40476 | 0.649901 | 2.004707 | 1.501484 |      |      |
|      | 0     |       | 2    | 1       | 50.40866 | 1.906544 | 1.019059 | 1.062662 |      | 12   |
|      | 1     |       | 2    | 1       | 120.4379 | 9.690309 | 0.289624 | 5.709426 |      | 8    |
|      | 0     |       | 1    | 2       |          |          |          |          |      | 8    |

|    |   |     |          |          |          |          |    |
|----|---|-----|----------|----------|----------|----------|----|
| 0  | 2 | 1   | 88.34873 | 7.506171 | 3.165752 | 4.01621  | 19 |
| 1  | 2 | 2   |          |          |          |          |    |
| 3  | 1 | 2   | 53.33141 | 1.171256 | 2.936365 | 2.219027 | 13 |
| 2  | 1 | 2   | 23.79175 | 2.53222  | 3.129229 | 1.235262 | 0  |
| 0  | 2 | 2   | 56.48977 | 5.437191 | 0.941445 | 8.71075  | 3  |
| 0  | 2 | 2   | 235.3506 | 3.302587 | 1.657952 | 4.53923  | 13 |
| 2  | 2 | 1   | 94.94997 | 1.476178 | 1.120128 | 3.388464 | 5  |
| 0  | 2 | 1.0 | 39.84851 | 3.159618 | 2.233809 | 2.193122 | 1  |
| 0  | 1 | 1   | 320.5386 | 2.631114 | 5.451097 | 3.108694 | 7  |
| 0  | 1 | 2   | 123.0478 | 0.836314 | 6.795905 | 2.189637 | 7  |
| 2  | 1 | 1.0 | 52.20623 | 1.703035 | 2.096476 | 3.984635 |    |
| 0  | 2 | 2   | 11.41988 | 8.976796 | 1.799221 | 1.331945 | 4  |
| 2  | 2 | 1   | 92.23721 | 1.532477 | 3.502618 | 2.213524 | 10 |
| 0  | 2 | 2   | 484.2471 | 2.842334 | 0.619053 | 6.361945 | 0  |
| 2  | 1 | 2   | 426.7636 | 1.578433 | 1.603356 | 8.997185 | 12 |
| 0  | 1 | 1   |          |          |          |          | 3  |
| 1  | 1 | 2   | 110.0511 | 1.944956 | 1.365438 | 1.37983  | 6  |
| 0  | 2 | 1   | 96.46937 | 9.176079 | 1.743583 | 3.53702  | 4  |
| 3  | 2 | 1   | 20.8069  | 2.950647 | 3.893128 | 1.240857 |    |
| 1  | 2 | 1   | 1.17454  | 7.548326 | 1.64263  | 1.919853 | 6  |
| 1  | 2 | 1   | 35.64096 | 9.465531 | 0.574151 | 2.033085 |    |
| 3  | 1 | 1   | 42.1495  | 0.471524 | 0.977448 | 1.006932 |    |
| 1  | 2 | 2   | 6.050664 | 2.193574 | 1.313074 | 1.917989 |    |
| 3  | 1 | 1   | 2.616507 | 9.712023 | 0.580764 | 1.70449  |    |
| 2  | 2 | 2   | 78.77831 | 2.566313 | 0.509253 | 1.258623 | 22 |
| 1  | 2 | 3   | 71.3265  | 11.54402 | 1.004811 | 2.996465 | 22 |
| 2  | 2 | 1   | 193.9669 | 9.103952 | 4.136478 | 5.773735 | 5  |
| 3  | 2 | 2   | 103.7509 | 2.359622 | 3.14531  | 0.917414 | 5  |
| 2  | 2 | 3   | 3.564369 | 20.91982 | 1.07614  | 3.242094 |    |
| 0  | 2 | 1   | 0.765909 | 3.332742 | 0.819204 | 0.735327 | 8  |
| 1  | 1 | 1   | 4.855126 | 6.245704 | 1.312283 | 5.446234 | 12 |
| 0  | 2 | 1   | 7.022084 | 8.205041 | 1.798733 | 9.50012  | 7  |
| 0  | 2 | 2   | 162.2484 | 9.950952 | 2.208651 | 1.315929 |    |
| 2  | 1 | 1   | 348.7674 | 4.600163 | 1.34866  | 0.701631 | 16 |
| 2  | 2 | 1   | 288.0965 | 2.963145 | 2.809948 | 6.0342   | 7  |
| 0  | 2 | 2   | 37.92404 | 6.036083 | 0.994202 | 5.148666 | 9  |
| 2  | 2 | 1   | 140.2248 | 2.506162 | 3.75745  | 7.119207 |    |
| 2  | 2 | 2   | 10.4714  |          | 2.145195 | 3.483356 |    |
| 1  | 2 | 3   | 9.700948 | 3.294724 | 0.243444 | 1.715521 | 10 |
| 1  | 2 | 3   | 64.98778 | 14.00488 | 5.333529 | 6.911704 | 29 |
| 1  | 2 | 2   | 544.6601 | 19.84413 | 1.306806 | 8.326998 |    |
| 0  | 1 | 2   | 35.99797 | 3.811626 | 1.385896 | 13.32943 | 11 |
| 3  | 1 | 1   |          |          |          |          |    |
| 2  | 3 | 3   | 23.03395 | 3.925207 | 5.16813  | 5.654955 |    |
| 1  | 1 | 1   | 11.76318 | 7.872167 | 0.14068  | 1.803016 |    |
| 0  | 1 | 1   | 35.05953 | 8.641515 | 1.641857 | 1.931074 | 0  |
| 0  | 2 | 2   | 46.3819  | 13.56042 | 1.155336 | 2.294551 | 10 |
| 3  | 1 | 3   | 49.3965  | 3.407309 | 1.823414 | 2.348931 | 8  |
| 15 | 2 | 1   | 54.50686 | 9.210451 | 1.398793 | 4.518644 | 5  |
| 1  | 2 | 2   | 36.70281 | 4.36637  | 1.185161 | 1.830943 |    |
| 0  | 1 | 2   | 75.46121 | 16.65285 | 0.58549  | 4.261868 | 8  |
| 1  | 1 | 1   | 54.58409 | 27.01109 | 2.70946  | 5.267281 |    |
| 1  | 1 | 2   | 83.93913 | 0.177595 | 1.528625 | 1.256485 | 1  |
| 0  | 2 | 3   | 66.13685 | 4.645542 | 0.767902 | 1.505776 | 14 |
| 0  | 1 | 2   | 28.77045 | 15.97694 | 1.553207 | 11.72847 | 10 |
| 1  | 1 | 1   | 26.14947 | 2.168852 | 0.991421 | 1.307508 | 19 |
| 0  | 2 | 2   | 30.48184 | 8.392293 | 0.85882  | 1.548446 | 22 |
| 0  | 2 | 2   | 67.4921  | 10.0738  | 2.075517 | 1.289855 |    |
| 1  | 3 | 2   | 161.4398 | 5.258806 | 1.372801 | 0.027563 | 20 |

|   |   |   |          |          |          |          |    |
|---|---|---|----------|----------|----------|----------|----|
| 0 | 2 | 1 | 123.1748 | 19.95652 | 14.42302 | 1.127745 |    |
| 1 | 2 | 2 | 41.8914  | 13.08194 | 0.367965 | 2.523367 | 1  |
| 3 | 1 | 2 | 21.63857 | 1.867717 | 0.892818 | 1.376349 | 11 |
| 3 | 1 | 2 | 17.79322 | 0.438304 | 1.280452 | 1.550466 | 21 |
| 2 | 1 | 1 | 38.16093 | 4.932505 | 3.790916 | 2.31306  | 10 |
| 0 | 2 | 3 | 60.02905 | 2.91882  | 2.227692 | 1.36086  | 8  |
| 2 | 1 | 1 | 308.2595 | 2.468285 | 1.588036 | 1.444023 | 8  |
| 1 | 2 | 3 | 13.39907 | 19.23181 | 4.410329 | 4.636584 |    |
| 2 | 2 | 2 | 238.7247 | 7.128135 | 1.874353 | 5.593803 | 3  |
| 2 | 1 | 1 | 108.298  | 20.82482 | 2.739598 | 3.57366  | 16 |
| 1 | 1 | 3 | 85.90869 | 7.285175 | 21.98266 | 13.10405 | 12 |
| 2 | 2 | 4 | 202.5604 | 3.160675 | 2.190413 | 4.362175 | 8  |
| 1 | 1 | 3 | 60.6177  | 4.172442 | 3.236001 | 4.813645 | 7  |
| 1 | 2 | 1 | 260.3229 | 1.504419 | 2.019134 | 2.783798 | 7  |
| 0 | 2 | 1 | 97.91323 | 30.26268 | 4.128818 | 3.749282 | 11 |
| 0 | 2 | 2 | 204.1412 | 18.39219 | 4.341021 | 6.429683 | 12 |
| 2 | 1 | 1 | 386.413  | 5.936774 | 3.569571 | 4.030849 | 9  |
| 1 | 1 | 1 | 144.2249 | 8.540465 | 2.807211 | 1.784672 |    |
| 0 | 2 | 2 | 5.83285  | 7.342223 | 2.045773 | 0.593648 |    |
| 2 | 1 | 2 | 5.164318 | 8.280867 | 2.442936 | 1.516691 | 34 |
| 3 | 3 | 2 | 12.02918 | 8.278689 | 3.058988 | 1.356148 | 6  |
| 3 | 3 | 1 | 30.58935 | 13.55447 | 3.880477 | 0.926046 |    |
| 1 | 1 | 1 | 88.93774 | 10.65218 | 6.958327 | 4.624389 | 3  |
| 1 | 2 | 1 | 21.47513 | 1.792594 | 3.295682 | 0.975134 | 8  |
| 1 | 1 | 1 | 73.90488 | 6.227943 | 0.606389 | 2.172353 | 0  |
| 1 | 1 | 1 | 63.0249  | 12.38338 | 3.580266 | 2.858584 | 5  |
| 3 | 2 | 1 | 72.76905 | 4.00935  | 4.64292  | 5.134052 |    |
| 0 | 2 | 1 | 53.05181 | 7.468349 | 0.306059 | 4.32146  | 15 |
| 3 | 1 | 1 | 11.59183 | 5.279391 | 3.695845 | 1.03277  | 1  |
| 1 | 1 | 2 | 1.710262 | 12.46022 | 0.673735 | 12.90138 | 9  |
| 0 | 1 | 1 | 11.23181 | 6.39299  | 4.071828 | 3.016119 | 1  |
| 1 | 3 | 1 | 4.16893  | 2.406457 | 2.736402 | 0.694721 | 9  |
| 2 | 1 | 2 | 71.66205 | 7.723716 | 7.335189 | 5.306774 | 8  |
| 3 | 2 | 1 | 23.68339 | 2.58536  | 4.971406 | 1.958565 | 20 |
| 1 | 1 | 1 | 32.52114 | 3.364938 | 0.432069 | 0.529159 | 1  |
| 2 | 2 | 1 | 154.1465 | 2.701909 | 2.463952 | 2.258958 | 9  |
| 1 | 1 | 1 | 655.3904 | 7.49344  | 1.995557 | 1.323356 | 0  |
| 1 | 1 | 1 | 0.439047 | 2.207498 | 8.94669  | 3.205971 | 0  |
| 0 | 2 | 2 | 6.821631 | 7.293202 | 0.608551 | 0.68983  | 5  |
| 2 | 2 | 1 | 30.00889 | 13.5041  | 0.921953 | 0.848756 | 6  |
| 1 | 2 | 1 | 30.39351 | 1.778395 | 0.575549 | 1.193528 | 1  |
| 0 | 3 | 2 | 25.98474 | 10.66091 | 1.825138 | 5.911602 | 1  |
| 2 | 1 | 1 | 86.66479 | 1.840099 | 1.068421 | 6.80351  | 0  |
| 2 | 1 | 1 | 179.5081 | 10.27926 | 3.10414  | 4.725388 | 0  |
| 3 | 1 | 1 | 29.33366 | 8.662058 | 3.989717 | 7.708353 | 22 |
| 1 | 2 | 1 | 205.7311 | 17.52617 | 3.8995   | 13.64665 | 14 |
| 1 | 1 | 1 |          |          |          |          | 0  |
| 1 | 1 | 1 |          |          |          |          | 2  |
| 3 | 1 | 2 | 25.90112 | 17.32494 | 0.420105 | 8.032462 | 4  |
| 2 | 1 | 1 | 70.30295 | 11.99937 | 0.977478 | 1.67701  | 10 |
| 3 | 1 | 1 | 9.459076 | 24.89508 | 0.536141 | 4.734981 |    |
| 2 | 1 | 1 |          |          |          |          | 9  |
| 1 | 3 | 4 | 285.8436 | 11.00916 | 1.121911 | 1.102034 | 5  |
| 1 | 2 | 1 | 2.477884 | 18.97363 | 0.165949 | 4.755225 | 1  |
| 0 | 3 | 1 | 127.5969 | 7.263958 | 2.378018 | 4.037574 | 3  |
| 2 | 3 | 1 |          |          |          |          | 12 |
| 2 | 1 | 3 | 9.289623 | 5.165083 | 1.066703 | 2.499398 | 12 |
| 0 | 2 | 1 | 17.47303 | 0.000257 | 0.602965 | 1.137289 | 3  |
| 1 | 1 | 2 | 4.154273 |          | 2.030841 | 2.124973 |    |

|   |   |   |          |          |          |          |    |
|---|---|---|----------|----------|----------|----------|----|
| 0 | 1 | 1 | 6.320564 | 3.72686  | 1.122367 | 1.210924 |    |
| 2 | 1 | 3 | 41.46086 | 10.09659 | 3.130396 | 5.094807 |    |
| 0 | 1 | 2 | 33.05195 | 2.920341 | 0.923315 | 1.743332 | 1  |
| 2 | 1 | 2 | 512.8746 | 1.579905 | 1.214122 | 4.225423 | 0  |
| 1 | 3 | 1 | 5.646759 | 3.775845 | 0.695377 | 1.233094 |    |
| 0 | 3 | 2 | 7.131255 | 4.365804 | 0.357831 | 3.0507   | 1  |
| 0 | 1 | 2 | 6.160669 | 4.304929 | 1.711427 | 0.342949 | 2  |
| 1 | 1 | 2 | 37.06101 | 4.935264 | 2.001809 | 2.120645 | 1  |
| 2 | 1 | 1 | 100.2392 | 4.802445 | 4.096764 | 2.398767 | 10 |
| 2 | 1 | 2 | 326.2208 | 1.913678 | 6.892514 | 6.677303 |    |
| 0 | 1 | 1 | 1797.558 | 0.551829 | 6.197421 | 5.065082 |    |
| 3 | 2 | 1 | 168.5024 | 1.552562 | 1.758192 | 1.948694 | 6  |
| 0 | 3 | 1 | 463.4292 | 1.230015 | 0.657075 | 2.457835 | 1  |
| 2 | 1 | 2 | 394.8133 | 0.211321 | 1.524374 | 1.78764  | 6  |
| 1 | 3 | 1 | 714.9153 | 2.562892 | 0.418095 | 5.513407 | 3  |
| 0 | 1 | 1 | 4418.914 | 1.948402 | 0.350719 | 18.55808 | 6  |
| 1 | 1 | 3 | 2834.364 | 1.800896 | 3.640435 | 9.945192 |    |
| 1 | 2 | 1 | 313.3306 | 2.091742 | 2.539871 | 4.543655 | 7  |
| 0 | 1 | 1 | 2554.753 | 1.297479 | 0.436335 | 11.96786 | 7  |
| 0 | 3 | 2 | 35.45518 | 2.18339  | 0.138711 | 1.141241 | 15 |
| 2 | 2 | 1 | 486.016  | 0.596291 | 1.509518 | 1.809839 | 0  |
| 2 | 3 | 2 | 433.0828 | 0.400284 | 0.289951 | 2.712248 | 21 |
| 1 | 3 | 1 | 461.2647 | 1.083702 | 0.91506  | 4.059498 | 12 |
| 1 | 3 | 2 | 144.6245 | 5.67547  | 0.208867 | 3.02223  | 12 |
| 1 | 1 | 2 | 600.4881 | 0.721145 | 0.414315 | 1.483754 | 2  |
| 3 | 1 | 1 | 403.0843 | 0.912399 | 0.993482 | 5.377051 | 2  |
| 2 | 1 | 2 | 882.4075 | 0.869745 | 0.488502 | 2.645722 | 14 |
| 1 | 1 | 1 | 61.69504 | 4.471831 | 2.112868 | 2.684462 | 6  |
| 0 | 2 | 1 | 323.9995 | 0.695874 | 0.981158 | 1.459493 | 0  |

| PSS | 検査時年  | 卵1       | 牛乳1   | 小麦1    | ピーナツ1   | 大豆1      | 米1    | ゴマ1     |
|-----|-------|----------|-------|--------|---------|----------|-------|---------|
| PSS | rast1 | age egg1 | milk1 | wheat1 | peanut1 | soybean1 | rice1 | sesame1 |
|     | 11    | 0.85     | 0     | 0      | 0       | 0        | 0     | 0       |
|     | 9     | 4.09     | 5.69  | 0      | 0       | 0        | 0     | 0       |
|     | 6     | 3        | 0     | 0      | 0       | 0        | 0     | 0       |
| 27  | 11    | 3        | 0     | 0      | 0       | 0        | 0     | 0       |
| 21  | 6     | 0.47     | 0     | 0.5    | 0       | 0        | 0     | 0       |
| 17  | 7     | 0        | 0     | 0      | 0       | 0        | 0     | 0       |
| 26  | 9     | 0        |       |        |         |          |       |         |
| 26  | 21    | 0        | 0     | 0      | 0       | 0        | 0     | 0       |
| 26  | 6     | 3        | 0     | 1      |         | 0        | 0     | 0       |
|     | 7     | 2        | 0     | 0      | 0       | 0        | 0     | 0       |
|     | 10    | 0        | 0     | 0      | 0       | 0        | 0     | 0       |
| 34  | 19    | 0        | 0     | 0      | 0       | 0        | 0     | 0       |
|     | 66    | 0        | 0     | 0      | 0       | 0        | 0     | 0       |
| 24  | 6     | 0.35     | 0     | 0      | 0       | 0        | 0     | 0       |
| 28  | 6     | 0        | 0     | 0      | 0       | 0        | 0     | 0       |
| 19  | 5     | 5        | 0     | 3      |         | 2        |       | 0       |
| 26  | 19    | 0        | 0     | 0      | 0       | 0        | 0     | 0       |
| 26  | 8     | 0        | 0     | 0      | 0       | 0        | 0     | 0       |
| 17  | 8     | 0        | 0     | 0      | 0       | 0        | 0     | 0       |
| 34  | 23    | 0        | 0     | 0      | 0       | 0        | 0     | 0       |
| 25  | 7     | 0        | 0     | 0      | 0       | 0        | 0     | 0       |
| 34  | 7     | 0        | 0     | 0      | 0       | 0        | 0     | 0       |
| 34  | 6     | 1.28     | 0     | 0      | 0       | 0        | 0     | 0       |
| 35  | 39    | 0.7      | 0     | 0      | 0       | 0        | 0     | 0       |
|     | 2     | 0        | 0     | 0      |         | 0        | 0     |         |
| 31  | 7     | 0        | 0     | 0      | 0       | 0        | 0     | 0       |
| 22  | 6     | 7.83     | 0     | 0      | 0       | 0        | 0     | 0       |
|     | 15    | 0.58     | 0     | 0      | 0       | 0        | 0     | 0       |
|     | 7     | 0        | 0     | 0      | 0       | 0        | 0     | 0       |
| 18  | 8     | 0        | 0     | 0      | 0       | 0        | 0     | 0       |
| 15  | 26    | 0.47     | 0     | 0      | 0       | 0        | 0     | 0       |
|     | 6     | 0        | 0     | 0      | 0       | 0        | 0     | 0       |
| 23  | 12    | 0.4      | 0     | 0      | 0       | 0        | 0     | 0       |
| 17  | 8     | 28.2     | 0     | 0      | 0       | 0        | 0     | 0       |
| 24  | 12    | 0        | 0     | 0      | 0       | 0        | 0     | 0       |
|     | 38    | 28.4     | 100   | 4.71   | 0.37    | 0.42     |       | 6.53    |
| 28  | 6     | 1.26     | 0     | 0      | 0       | 0        | 0     | 0       |
| 16  | 57    | 0        | 0     | 0      | 0       | 0        | 0     | 0       |
| 19  | 52    | 0        | 0     | 0      | 0       | 0        | 0     | 0       |
| 19  | 6     | 1.75     | 0     | 0      | 0       | 0        | 0     | 0       |
| 26  | 7     | 0        | 0     | 0      | 0       | 0        | 0     | 0       |
| 23  | 6     | 2.06     | 0     | 0      | 0       | 0        | 0     | 0       |
| 19  | 9     | 0        | 0     | 0      | 0       | 0        | 0     | 0       |
| 24  | 11    | 0.91     | 0.74  | 2.38   | 2.22    | 0.82     | 0     | 3.92    |
| 26  | 28    | 0        | 0     | 0      | 0       | 0        | 0     | 0       |
| 31  | 7     | 0        | 0     | 0      | 0       | 0        | 0     | 0       |
| 29  | 3     | 0        | 0     | 0      | 0       | 0        |       | 0       |
| 19  | 19    | 2        | 1     | 0      | 0       | 0        | 0     | 0       |
| 23  | 7     | 0        | 0     | 0      | 0       | 0        | 0     | 0       |
| 23  | 39    | 1.26     | 0     | 0      | 0       | 0        | 0     | 0       |
|     | 7     | 0        | 0     | 0      | 0       | 0        | 0     | 0       |
|     | 28    | 0.41     | 0     | 0      | 0       | 0        | 0     | 0       |
| 28  | 18    | 0        | 0     | 0      | 0       | 0        | 0     | 0       |
| 23  | 8     | 2.35     | 0.65  | 0      | 0       | 0        | 0     | 0       |
| 28  | 6     | 0        | 0     | 0      | 0       | 0        | 0     | 0       |

|    |          |       |      |      |      |      |      |      |
|----|----------|-------|------|------|------|------|------|------|
| 29 | 6        | 0     | 0    | 0    | 0    | 0    | 0    | 0    |
|    | 6        | 0     | 1.23 | 0    | 0    | 0    | 0    | 0    |
| 30 | 9        | 19.34 | 8.65 | 0.47 | 0    | 0.93 | 0    | 0    |
| 9  | 7        | 11.1  | 0.35 | 0    | 0.7  | 0    | 0    | 0    |
| 22 | 12       | 0     | 0    | 0    | 0    | 0    | 0    | 0    |
| 31 | 29       | 0     | 0    | 0    | 0    | 0    | 0    | 0    |
| 20 | 21       | 5.86  | 1.3  | 0    | 1.77 | 0    | 0    | 9.68 |
| 17 | 26       | 0     | 0    | 0    | 0    | 0    | 0    | 0    |
| 26 | 66       | 0     | 0    | 0    | 0    | 0    | 0    | 0    |
| 26 | 40       | 0     | 0    | 0    | 0    | 0    | 0    | 0    |
|    | 13       | 2.32  | 0    | 0.59 | 0.5  | 0.35 | 0.48 | 0.63 |
| 17 | 8        | 0     | 0    | 0    | 0    | 0    | 0    | 0    |
| 23 | 12       | 3.72  | 4.62 | 0    | 8.85 | 0.53 | 0    | 0.83 |
| 22 | 6        | 0     | 0    | 0    | 0    | 0    | 0    | 0    |
| 26 | 5        | 1.05  | 2.22 | 0    | 0    | 0    | 0    | 0    |
| 8  | 72       | 0     | 0    | 0    | 0    | 0    | 0    | 0    |
| 25 | 7        | 1.43  | 0    | 0    | 0    | 0    | 0    | 0    |
| 25 | 7        | 0     | 0    | 0    | 0    | 0    | 0    | 0    |
|    | 6        | 33    | 3.06 | 20   |      | 0.81 | 5.45 |      |
| 16 | 7        | 10.4  | 0    | 0    | 0    | 0    | 0    | 0    |
|    | 29       | 5.58  | 0    | 0    | 0    | 0    | 0    | 0    |
|    | 2        | 0     | 0    | 0    |      | 0    |      |      |
|    | 8        | 0.56  | 0    | 0    | 0    | 0    | 0    | 0    |
|    | 13       | 37.5  | 19.9 | 2.55 | 5.6  | 6.23 | 0.64 | 3.31 |
| 35 | 5        | 2.16  | 0.37 | 0    | 0    | 0    | 0    | 0    |
| 35 | 5        | 0     | 0.41 | 0    | 0    | 0    | 0    | 0    |
| 19 | 7        | 5.91  | 1.08 | 1.08 | 0    | 0    | 0    | 0    |
| 19 | 7        | 30.8  | 16.6 | 12.9 | 0    | 0    | 0    | 0.38 |
|    | 27       | 0.86  | 0    | 0.52 | 0    | 0    | 0    | 0    |
| 20 | 26       | 0     | 0    | 0    | 0    | 0    | 0    | 0    |
| 29 | 6        | 4.91  | 0    | 0    | 0    | 0    | 0    | 0    |
| 19 | 6        | 0     | 0    | 0    | 0    | 0    | 0    | 0    |
|    | 17       | 0     | 0    | 0    | 0    | 0    | 0    | 0    |
| 26 | 6        | 8.63  | 0    | 2.19 | 0    | 0    | 0.41 | 0    |
| 22 | 7        | 17.5  | 5.11 | 0    | 1    | 0.81 | 0    | 0.4  |
| 24 | 6        | 0     | 0    | 0    | 0    | 0    | 0    | 0    |
|    | 6        | 20.3  | 0    | 0    | 0    | 0    | 0    | 0    |
|    | 7        | 0.8   | 0    | 0    | 0    | 0    | 0    | 0    |
| 22 | 15       | 3.24  | 0    | 0    | 0    | 0    | 0    | 0    |
| 37 | 8        | 3     | 0    | 0    |      |      |      |      |
|    | 3        | 1.01  | 0    | 0    | 0    | 0    | 0    | 0    |
| 31 | 6        | 0     | 0    | 0    | 0    | 0    | 0    | 0    |
|    | 8        | 16.9  | 7.22 | 34.4 | 0.67 | 1.9  | 0.97 | 14.3 |
|    | 36       | 0.91  | 0.72 | 0    | 0    | 0    | 0    | 0    |
|    | 14       | 0.39  | 0    | 0    | 0    | 0    | 0.47 | 0    |
| 12 | 6        | 0     | 0    | 0    | 0    | 0    | 0    | 0    |
| 24 | 6        | 0     | 0    | 0    | 0    | 0    | 0    | 0    |
| 26 | 6        | 5.43  | 0    | 0    | 0    | 0    | 0    | 0    |
| 26 | 6        | 1.13  | 0    | 0    | 0    | 0    | 0    | 0    |
|    | 6        | 1.38  | 0    | 0    | 0    | 0    | 0    | 0    |
| 20 | 6        | 0     | 0    | 0    | 0    | 0    | 0    | 0    |
|    | 6 3(スコアの |       | 0    | 0    | 0    |      |      |      |
| 20 | 23       | 8.14  | 0    | 1.12 | 0    | 0    | 0    | 0.35 |
| 31 | 3        | 0     | 0    | 0    | 0    | 0    | 0    | 0    |
| 39 | 11       | 0     | 0    | 0    | 0    | 0    | 0    | 0    |
| 29 | 3        | 9.95  | 0    | 0    |      | 0    | 0    |      |
| 29 | 8        | 0     | 0    | 0    | 0    | 0    | 0    | 0    |
|    | 48       | 0     | 0    | 0    | 0    | 0    | 0    | 0    |
| 30 | 11       | 1.84  | 0    | 0    | 1.6  | 0    | 0    | 0    |

|    |    |        |      |      |      |      |      |      |
|----|----|--------|------|------|------|------|------|------|
| 29 | 14 | 0      | 0    | 0    | 0    | 0    | 0    | 0    |
| 24 | 6  | 6.4    | 0    | 0.38 | 0    | 0    | 0    | 0    |
| 21 | 5  | 3(スコアの | 0    | 0    | 0    | 0    | 0    | 0    |
| 36 | 7  | 6.19   | 0.44 | 0    |      | 0    | 0    |      |
| 26 | 7  | 19.3   | 1.83 | 0    | 0    | 2.09 | 0    | 0    |
| 28 | 6  | 0      | 0    | 0    | 0    | 0    | 0    | 0    |
| 19 | 11 | 31.1   | 2.17 | 20.2 | 0.66 | 1.38 | 0    | 0    |
|    | 6  | 7.26   | 4.86 | 4.28 |      |      |      |      |
| 25 | 7  | 15.5   | 0.48 | 0    | 0    | 0    | 0    | 0    |
| 42 | 8  | 8.39   | 0.8  | 0    | 0    | 0    | 0    | 0    |
| 35 | 9  | 0.36   | 0    | 0    | 0    | 0    | 0    | 0    |
| 23 | 7  | 19.6   | 6.17 | 0    | 0    | 0    | 0    | 0    |
| 15 | 9  | 5.86   | 0    | 0    | 0    | 0    | 0    | 0    |
| 26 | 16 | 1.2    | 0    | 0    | 2.09 | 0    | 0.74 |      |
| 23 | 9  | 0      | 0    | 0    | 0    | 0    | 0    | 0    |
| 27 | 31 | 0      | 0    | 0    | 0    | 0    | 0    | 0    |
| 27 | 8  | 11.3   | 15.2 | 0    | 0    | 0    | 0    | 0    |
|    | 20 | 0.51   | 0    | 0    | 0    | 0    | 0    | 0    |
|    | 3  | 0      | 0    | 0    | 0    | 0    | 0    | 0    |
| 26 | 6  | 18.2   | 0    | 0.76 | 0    | 0    | 0    | 0    |
| 16 | 19 | 0.94   | 0.65 | 0.67 | 0.51 | 0    | 0.39 | 1.65 |
|    | 24 | 2.28   | 5.28 | 0.58 | 0    | 0    | 0    | 0    |
| 13 | 7  | 1.79   | 0    | 0    | 0    | 0    | 0    | 0    |
| 32 | 7  | 0      | 0.46 | 0    | 0    | 0    | 0    | 0    |
| 3  | 7  | 2.2    | 0    | 0    | 0    | 0    | 0    | 0    |
| 16 | 14 | 0.62   | 0    | 0    | 0    | 0    | 0    | 0.99 |
| 19 | 7  | 57.3   | 0.88 | 3.42 | 0    | 3.52 | 0    | 0    |
| 21 | 8  | 0      | 0    | 0    | 0    | 0    | 0    | 0    |
| 12 | 5  | 66.1   | 2.86 | 2.05 | 42.4 | 0    | 0    | 0    |
| 26 | 7  | 2.12   | 0    | 0    | 0    | 0    | 0    | 0    |
| 12 | 13 | 0.4    | 0    | 0    | 0    | 0    | 0    | 0    |
| 23 | 30 | 0.42   | 0    | 0    | 0    | 0    | 0    | 0    |
| 23 | 6  | 0      | 1.79 | 0    | 0    | 0    | 0    | 0    |
| 27 | 72 | 2(スコアの | 2    | 2    |      |      |      |      |
| 10 | 6  | 1.6    | 0    | 0    | 0    | 0    | 0    | 0    |
| 35 | 8  | 3.29   | 0    | 0    | 0    | 0    | 0    | 0    |
| 10 | 6  | 6.61   | 0    | 0    | 0    | 0    | 0    | 0    |
| 7  | 7  | 1.49   | 0    | 0    | 0    | 0    | 0    | 0    |
| 22 | 10 | 0      | 0    | 0    | 0    | 0    | 0    | 0    |
| 18 | 22 | 3.23   | 1.17 | 0    | 0    | 0    | 0    | 0.49 |
| 14 | 7  | 0.77   | 0    | 0    | 0    | 0    | 0    | 0    |
| 11 | 10 | 0      | 0    | 0    | 0    | 0    | 0    | 0    |
| 10 | 7  | 4.38   | 1.94 | 0    | 0    | 0    | 0    | 0    |
| 17 | 7  | 11.6   | 0.48 | 0    | 0    | 0    | 0    | 9.07 |
| 37 | 9  | 1.38   | 0.63 | 0    | 0    | 0    | 0    | 0    |
| 23 | 10 | 0.54   | 0    | 0    | 0    | 0    | 0    | 0    |
| 9  | 8  | 1.08   | 0    | 0    | 0    | 0    | 0    | 0    |
| 15 | 8  | 2.43   | 0.4  | 0    | 0    | 0    | 0    | 0    |
| 21 | 6  | 0.59   | 0    | 14.5 | 0    | 0    | 0    | 0    |
| 25 | 47 | 1.02   | 0    | 1.53 | 1.99 | 1.37 | 1.84 | 1.96 |
|    | 7  | 13.7   | 0.38 | 0    | 0    | 0.61 | 0    | 0    |
| 25 | 18 | 0.61   | 0    | 0.71 | 0.42 | 0    | 0    | 0.42 |
| 8  | 16 | 0.36   | 0    | 0    | 0    | 0    | 0    | 0    |
| 10 | 22 | 1.95   | 0    | 0    | 0    | 0    | 0    | 0    |
| 20 | 48 | 0      | 0    | 0    | 0    | 0    | 0    | 0    |
| 26 | 7  | 17.4   | 0    | 6.78 | 0    | 1.45 | 2.41 | 0.35 |
| 26 | 7  | 2.07   | 0    | 0    | 0    | 0    | 0    | 0    |
| 17 | 13 | 2.66   | 0    | 0    | 0    | 0    | 0    | 0    |
|    | 27 | 2.11   | 0    | 0    | 2.23 | 0.36 | 0    | 0.58 |

|    |          |      |      |      |      |      |      |      |
|----|----------|------|------|------|------|------|------|------|
|    | 60       | 0    | 0    | 0    | 0    | 0    | 0    | 0    |
|    | 72       | 0.72 |      | 0.42 |      |      |      |      |
| 10 | 24       | 0    | 0    | 0    | 0    | 0    | 0    | 0    |
| 7  | 3        | 21.7 | 0.84 | 0    | 0    | 0    | 0    | 0    |
|    | 10       | 1.34 | 0    | 0    | 0    | 0    | 0    | 0    |
| 13 | 11       | 0    | 0    | 0    | 0    | 0    | 0    | 0    |
| 19 | 36       | 0    | 0    | 0    | 0    | 0    | 0    | 0    |
| 12 | 8        | 10.4 | 0    | 0    | 0    | 0    | 0    | 0    |
| 30 | 4        | 10.9 | 2.39 |      |      |      |      |      |
|    | 11       | 0    | 0.35 | 0.42 | 0    | 0.4  | 0    | 0    |
|    | 60       | 0    | 0    | 0    | 0    | 0.49 | 0    | 0    |
| 21 | 36       | 0.54 | 0.49 | 2.65 | 0    | 0    | 0    | 1.26 |
| 10 | 11       | 0    | 0    | 0    | 0    | 0    | 0    | 0    |
| 30 | 9        | 11.5 | 0    | 3.37 | 0    | 0    | 0    | 0    |
| 11 | 6        | 0.82 | 0    | 0    | 0    | 0    | 0    | 0    |
| 20 | 7        | 0    | 0    | 0    | 0    | 0    | 0    | 0    |
|    | 15       | 0.76 | 0    | 0    | 0    | 0    | 0    | 0    |
| 23 | 7        | 4.17 | 0    | 0    | 0    | 0    | 0    | 0    |
| 19 | 9        | 0    | 0    | 0    | 0    | 0    | 0.44 | 0    |
| 27 | 7        | 0    | 0    | 0    | 0    | 0    | 0    | 0    |
| 15 | 9        | 5.15 | 0    | 0.52 | 0    | 0    | 0    | 0    |
| 30 | 9        | 0.6  | 0.61 | 0    | 0    | 0    | 0    | 0    |
| 24 | 9        | 0.43 | 0    | 0    | 0    | 0    | 0    | 0    |
| 24 | 6        | 0.66 | 0    | 0    | 0    | 0    | 0    | 0    |
| 11 | 13       | 1.67 | 0    | 0    | 0    | 0    | 0    | 0    |
| 14 | 10       | 42.6 | 14.3 | 1.28 | 0    | 0.42 | 4.88 | 4.54 |
| 36 | 6        | 92.2 | 0    | 1.05 | 0    | 0    | 0    | 0    |
| 16 | 7        | 0.56 | 0    | 0    | 3.11 | 0    | 0    | 0.8  |
| 10 | 9 2(スコアの |      | 0    | 0    |      | 0    |      |      |

| そば1       | えび1     | いわし1     | ハウスダスト1    | ダニ1   | 総IgE1 | 検査時年齢1   | 卵2   | 牛乳2   |
|-----------|---------|----------|------------|-------|-------|----------|------|-------|
| buckwheat | shrimp1 | sardine1 | housedust1 | mite1 | IgE1  | agerast2 | egg2 | milk2 |
| 0         | 0       | 0        | 0          | 0     | 0     | 0        |      |       |
| 0         | 0       | 0        |            |       |       |          | 13   | 5.49  |
| 0         | 0       | 0        | 0          | 0     | 0     |          | 15   | 1.23  |
| 0         | 0       | 0        |            |       | 0     |          | 29   | 0.95  |
| 0         | 0       | 0        |            |       | 0     |          | 13   | 3.8   |
| 0         | 0       | 0        |            |       | 0     |          |      |       |
|           |         |          |            |       | 14    | 14       | 6.33 | 0     |
| 0         | 0       | 0        |            |       | 0     |          |      |       |
|           | 0       |          | 0          | 0     | 20    | 11       | 4    |       |
| 0         | 0       | 0        |            |       |       | 14       | 1    | 0     |
| 0         | 0       | 0        |            |       | 0     |          |      |       |
| 0         | 0       | 0        |            |       | 0     |          |      |       |
| 0         | 0       | 0        | 0          | 0     |       |          |      |       |
| 0         | 0       | 0        |            |       | 0     |          | 10   | 0.76  |
| 0         | 0       | 0        |            |       | 0     |          | 11   | 0.41  |
|           |         |          |            |       | 0     |          | 7    | 3     |
| 0         | 0       | 0        |            |       | 0     |          |      |       |
| 0         | 0       | 0        |            |       | 0     |          |      |       |
| 0         | 0       | 0        |            |       | 0     |          |      |       |
| 0         | 0       | 0        |            |       | 0     |          | 31   | 0.87  |
| 0         | 0       | 0        |            |       | 0     |          | 17   | 1.2   |
| 0         | 0       | 0        |            |       | 0     |          |      |       |
| 0         | 0       | 0        |            |       | 0     |          | 13   | 0     |
| 0         | 0       | 0        | 0          | 0     | 35    | 12       | 0    | 0     |
| 0         | 0       | 0        |            |       |       | 10       | 2.17 | 0     |
| 0         | 0       | 0        |            |       | 0     |          |      |       |
|           |         |          |            |       | 23    |          |      |       |
|           |         |          |            |       | 15    | 11       | 7.68 | 0     |
| 0         | 0       | 0        |            |       | 0     |          | 14   | 0     |
| 0         | 0       | 0        |            |       | 0     |          |      |       |
| 0         | 0       | 0        |            |       | 0     |          | 10   | 10.5  |
| 0         | 0       | 0        |            |       | 0     |          | 22   | 0.48  |
| 0         | 0       | 0        |            |       | 0     |          |      |       |
| 0         | 0       | 0        |            |       | 0     |          |      |       |
| 0         | 0       | 0        |            |       | 0     |          |      |       |
| 0         | 0       | 0        | 0          | 0     |       |          | 38   | 0     |
| 0         | 0       | 0        |            |       | 0     |          |      |       |
| 0         | 0       | 0        |            |       | 0     |          |      |       |
| 0         | 0       | 0        |            |       | 0     |          | 35   | 0     |
| 0         | 0       | 0        |            |       | 0     |          | 19   | 5.24  |
| 0         | 0       | 0        |            |       | 0     |          |      |       |
|           | 0.42    | 1.66     |            |       | 100   |          | 47   | 13.9  |
| 0         | 0       | 0        |            |       | 0     |          | 15   | 0.68  |
| 0         | 0       | 0        | 6.44       | 6.49  | 136   |          |      |       |
| 0         | 0       | 0        |            |       | 0     |          |      |       |
| 0         | 0       | 0        |            |       | 0     |          |      |       |
| 0         | 0       | 0        |            |       | 0     |          | 11   | 4.57  |
| 0         | 0       | 0        |            |       | 0     |          | 14   | 0     |
| 0         | 0       | 0        |            |       | 0     |          |      |       |
| 0         | 0       | 0        |            |       | 0     |          | 16   | 0     |
| 0         | 0       | 0        |            |       | 0     |          |      |       |
| 0         | 0       | 0        |            |       | 0     |          | 13   | 0     |
|           |         |          |            |       |       |          | 6    | 0     |
| 0         | 0       | 0        | 5          | 5     |       | 35       | 1    | 2     |
| 0         | 0       | 0        |            |       | 0     | 52       | 11   | 1.18  |
| 0         | 0       | 0        |            |       | 0     |          |      |       |
| 0         | 0       | 0        |            |       | 0     |          | 14   | 0.76  |
| 0         | 0       | 0        |            |       | 0     |          |      |       |
| 0         | 0       | 0        |            |       | 0     |          |      |       |
| 0         | 0       | 0        |            |       | 0     |          | 13   | 1.36  |
| 0         | 0       | 0        |            |       | 0     |          |      |       |
|           |         |          |            |       | 5     |          |      |       |

|      |      |      |      |      |      |    |      |      |
|------|------|------|------|------|------|----|------|------|
| 0    | 0    | 0    | 0    | 0    | 18   |    |      |      |
| 0    | 0    | 0    | 0    | 0    |      | 10 | 21.2 | 3.29 |
| 0    | 0    | 0    |      | 0    | 520  | 13 | 29   | 7.67 |
| 0    | 0    | 0    |      |      |      | 11 | 8.79 | 0.5  |
| 0    | 0    | 0    |      | 0    | 13   | 20 | 0.64 | 0.45 |
| 0    | 0    | 0    |      | 0    | 24   |    |      |      |
| 0.8  | 0    | 2.08 |      | 0    |      |    |      |      |
| 0    | 0    | 0    |      | 0.59 |      |    |      |      |
| 0    | 0    |      | 12.7 | 13.3 | 57   |    |      |      |
| 0    | 0    | 0    | 0    | 0    | 19   |    |      |      |
| 0.4  | 0    | 0    |      | 52.4 | 230  |    |      |      |
| 0    | 0    | 0    |      | 0    | 3    |    |      |      |
| 0.42 | 0    | 0    |      |      |      | 30 | 1.43 | 1.39 |
| 0    | 0    | 0    |      | 0    | 12   |    |      |      |
| 0    | 0    | 0    |      | 0    | 56   | 9  | 4.78 | 1.96 |
| 0    | 0.67 |      | 0.73 | 0.6  | 40   |    |      |      |
| 0    | 0    | 0    |      | 0    |      | 11 | 0.5  | 0    |
| 0    | 0    | 0    |      | 0    | 3    |    |      |      |
|      |      |      |      |      | 158  | 13 | 56.1 | 4.41 |
| 0    | 0    | 0    | 0    | 0    |      | 13 | 3.83 | 0    |
| 0    | 0    | 0    |      | 0    |      |    |      |      |
|      |      |      |      | 0    | 34   | 15 | 100  | 2.99 |
| 0    | 0    | 0    |      |      | 26   |    |      |      |
| 0    | 1.07 | 2.26 |      | 72   |      | 29 | 19.7 | 12.9 |
| 0    | 0    | 0    |      | 0    | 6    |    |      |      |
| 0    | 0    | 0    |      |      |      | 18 | 1.42 | 0    |
| 0    | 0    | 0    |      |      |      | 18 | 15   | 5.26 |
| 0    | 0    | 0    |      | 57.8 | 195  |    |      |      |
| 0    | 0    | 0    | 0    | 0    | 8    |    |      |      |
| 0    | 0    | 0    |      | 0    | 17   | 11 | 2.42 | 0    |
| 0    | 0    | 0    |      |      | 6    | 12 | 0    | 0    |
| 0    | 0    | 0    | 0    | 0    |      |    |      |      |
| 0    | 0    | 0    |      |      | 42   | 10 | 10.9 | 0.63 |
| 0    | 0    | 0    |      |      | 126  | 11 | 9.48 | 1.83 |
| 0    | 0    | 0    |      | 0    | 5    |    |      |      |
| 0    | 0    | 0    |      |      | 53   | 18 | 9.06 | 0    |
| 0    | 0    | 0    |      | 0    |      | 15 | 0    | 0    |
| 0    | 0    | 0    |      | 0    | 145  | 21 | 0.95 | 0    |
|      |      |      |      |      |      | 18 | 2.61 | 0    |
| 0    | 0    | 0    |      | 0    | 7    | 9  | 1.04 | 0    |
| 0    | 0    | 0    |      | 0    |      | 12 | 0    | 0    |
| 0    | 2.38 | 0    |      |      | 383  | 12 | 8.75 | 6.3  |
| 0    | 0    | 0    |      | 33.1 | 226  |    |      |      |
| 0    | 0    | 0    |      | 0    | 9    |    |      |      |
| 0    | 0    | 0    |      | 0    | 6    | 12 | 0    | 0    |
| 0    | 0    | 0    |      | 0    |      | 13 | 2.18 | 0.41 |
| 0    | 0    | 0    |      |      |      | 12 | 3.69 | 0    |
| 0    | 0    | 0    |      | 0    | 36   | 10 | 11.5 | 1.2  |
| 0    | 0    | 0    |      | 0    | 20   |    |      |      |
| 0    | 0    | 0    |      | 0    | 11   |    |      |      |
|      |      |      |      | 0    | 30   | 16 | 6.29 | 0    |
| 0    | 0    | 0    |      | 0    | 5    | 29 | 1.65 | 0    |
| 0    | 0    | 0    |      | 0    | 10   |    |      |      |
| 0    | 0    | 0    |      | 0    |      |    |      |      |
|      | 0    |      | 0    | 0    | 28.8 | 13 | 12.8 |      |
| 0    | 0    | 0    |      | 0    | 13   |    |      |      |
| 0    | 0    | 0    |      | 0    |      |    |      |      |
| 0    | 0    | 0    |      | 2.79 | 40   | 18 | 0.87 | 0.77 |

|      |      |      |      |      |     |    |      |      |
|------|------|------|------|------|-----|----|------|------|
| 0    | 0    | 0    |      |      | 20  |    |      |      |
| 0    | 0    | 0    | 0    | 0    | 122 | 10 | 4.72 | 0    |
|      |      |      | 0    | 0    | 38  | 7  | 100  | 58.8 |
|      | 0    |      | 0    | 0    | 97  | 17 | 5.19 | 0    |
| 0    | 0    | 0    |      | 0    | 100 | 11 | 18.3 | 1.59 |
| 0    | 0    | 0    |      | 0    | 8   | 13 | 0.43 | 0    |
| 0    |      | 0    | 0    | 0    | 229 | 19 | 28   | 0.69 |
|      |      |      |      | 0    |     | 9  | 5.32 | 0    |
| 0    | 0    | 0    |      | 0    | 59  | 12 | 6.58 | 0    |
| 0    | 0    | 0    |      | 0    |     | 13 | 5.26 | 0.47 |
| 0    | 0    | 0    |      |      | 35  | 13 | 0    | 0    |
| 0    | 0    | 0    |      |      | 142 | 11 | 20.6 | 6.27 |
| 0    | 0    | 0    |      | 0    |     | 16 | 2.49 | 0    |
| 0    |      |      |      | 21.1 |     | 23 | 0.86 | 0    |
| 0    | 0    | 0    |      | 0    |     | 17 | 0    | 0    |
| 0    | 0    | 0    |      | 0    | 121 |    |      |      |
| 0    | 0    | 0    |      | 0    | 76  | 12 | 6.42 | 6.73 |
| 0    | 0    | 0    |      | 0    | 134 |    |      |      |
| 0    | 0    | 0    |      |      | 2   | 6  | 0    | 0    |
| 0    | 0.9  | 0    |      | 0    | 146 |    |      |      |
| 0    | 0    | 0    |      |      | 684 |    |      |      |
| 0    | 0    | 0    |      | 0    | 288 |    |      |      |
| 0    | 0    | 0    |      | 0    | 14  |    |      |      |
| 0    | 0    | 0    |      | 0    |     | 11 | 1.83 | 0    |
| 0    | 0    | 0    |      |      | 12  | 12 | 6.42 | 0    |
| 0.6  | 0    | 0.53 |      |      |     |    |      |      |
| 0    | 0    | 0    | 0    | 0    | 250 | 12 | 33.2 | 1.64 |
| 0    | 0    | 0    |      | 0    | 11  |    |      |      |
| 0    | 0    | 0    |      | 0    |     | 9  | 13.9 | 22.1 |
| 0    | 0    | 0    |      | 0    |     | 12 | 0.87 | 0    |
| 0    | 0    | 0    |      | 0    |     | 23 | 0    | 0    |
| 0    | 0    | 0    |      |      | 969 |    |      |      |
| 0    | 0    | 0    |      | 0    | 13  | 10 | 2.53 | 1.75 |
|      | 1.12 |      | 9.28 | 10.3 | 367 |    |      |      |
| 0    | 0    | 0    |      |      | 30  | 10 | 4.56 | 0    |
| 0    | 0    | 0    | 0    | 0    |     | 13 | 5.97 | 1.66 |
| 0    | 0    | 0    |      | 0    | 20  |    |      |      |
| 0    | 0    | 0    |      | 0    | 24  | 12 | 2.49 | 0    |
| 0    | 0    | 0    |      | 0    | 12  |    |      |      |
| 0    | 0    | 0    |      | 100  | 374 |    |      |      |
| 0    | 0    | 0    |      | 0    | 11  | 12 | 0.95 | 0    |
| 0    | 0    | 0    |      | 0    | 5   |    |      |      |
| 0    | 0    | 0    |      |      | 30  | 11 | 2.64 | 0.78 |
| 0    | 0    | 0    |      |      | 101 | 11 | 12.2 | 0.58 |
| 0    | 0    | 0    |      | 0    |     | 14 | 1.3  | 0.56 |
| 0    | 0    | 0    |      | 0    | 12  | 15 | 0    | 0    |
| 0    | 0    | 0    |      |      | 13  | 13 | 0.91 | 0    |
| 0    | 0    | 0    |      | 0    |     | 14 | 2.19 | 0    |
| 0    | 0    | 0    |      |      |     | 9  | 1.82 | 0.39 |
| 1.71 | 0    | 0    |      | 33.7 | 112 |    |      |      |
| 0    | 0    | 0    |      | 0    | 57  | 12 | 9.3  | 0.84 |
| 0    | 0    | 0    |      |      | 70  |    |      |      |
| 0    | 0    | 0    |      | 0    | 198 |    |      |      |
| 0    | 0    | 0    |      |      | 94  |    |      |      |
| 0    | 0    | 0    | 0    | 0    | 13  |    |      |      |
| 0    | 0    | 0    |      |      | 171 | 11 | 11   | 0    |
| 0    | 0    | 0    |      | 0    |     | 17 | 0.54 | 0.38 |
| 0    | 0    | 0    | 0    | 0    |     | 32 | 0    | 0    |
| 0    | 0    | 0    |      | 39.2 | 168 |    |      |      |

|      |   |   |      |      |     |    |      |      |
|------|---|---|------|------|-----|----|------|------|
| 0    | 0 | 0 | 3.8  | 4.01 | 187 |    |      |      |
| 0    | 0 | 0 | 45.5 | 45.1 | 138 |    |      |      |
| 0    | 0 | 0 |      | 0    | 42  |    |      |      |
| 0    | 0 | 0 | 0    | 0    |     | 10 | 4.44 | 2.4  |
| 0    | 0 | 0 |      | 0    | 10  | 15 | 0.51 | 0    |
| 0    | 0 | 0 |      | 0    |     |    |      |      |
| 0    | 0 | 0 |      | 0    | 30  |    |      |      |
| 0    | 0 | 0 |      | 0    |     | 18 | 39.1 | 0.35 |
| 0    | 0 | 0 |      | 0    |     | 24 | 0    | 0.69 |
| 0    | 0 | 0 | 0    | 0    | 34  |    |      |      |
| 0    | 0 | 0 |      | 17.1 | 169 |    |      |      |
| 0    | 0 | 0 | 0    | 0    | 11  |    |      |      |
| 0    | 0 | 0 |      | 0    | 111 | 13 | 6.52 | 0    |
| 0    | 0 | 0 | 0    | 0    | 7   | 10 | 0.69 | 0    |
| 0    | 0 | 0 | 0    | 0    | 40  |    |      |      |
| 0    | 0 | 0 | 0    | 0    | 53  |    |      |      |
| 0    | 0 | 0 |      | 33.2 |     | 12 | 1.59 | 0    |
| 0    | 0 | 0 | 0    |      | 85  |    |      |      |
| 0    | 0 | 0 | 0    |      | 25  |    |      |      |
| 0.68 | 0 | 0 | 0    |      | 22  |    |      |      |
| 0    | 0 | 0 | 0    | 0    | 59  |    |      |      |
| 0    | 0 | 0 | 0    | 0    |     | 29 | 0.69 | 0    |
| 0    | 0 | 0 |      | 0    |     | 21 | 0.65 | 0    |
| 0    | 0 | 0 |      | 0    |     | 21 | 1.54 | 0    |
| 0.35 | 0 | 0 |      | 0    | 316 | 13 | 24.9 | 7.15 |
| 0    | 0 | 0 | 0    | 0    | 797 | 9  | 82.4 | 0    |
| 0    | 0 | 0 | 0    |      | 9   | 11 | 0.38 | 0    |
|      |   |   |      |      | 16  | 14 |      |      |

小麦2    ピーナツ2 大豆2    米2    ゴマ2    そば2    えび2    いわし2    ハウスダスト2  
wheat2    peanut2    soybean2    rice2    sesame2    buckwheat    shrimp2    sardine2    housedust2

|      |   |   |      |      |   |   |   |
|------|---|---|------|------|---|---|---|
| 0    | 0 | 0 | 0    | 6.31 | 0 | 0 | 0 |
| 0    | 0 | 0 | 0    | 0    | 0 | 0 | 0 |
| 0    | 0 | 0 | 0    | 0    | 0 | 0 | 0 |
| 1.52 | 0 | 0 | 1.12 | 0    | 0 | 0 | 0 |

|   |   |   |   |   |   |   |   |
|---|---|---|---|---|---|---|---|
| 0 | 0 | 0 | 0 | 0 | 0 | 0 | 0 |
|---|---|---|---|---|---|---|---|

|   |   |   |   |   |   |   |   |
|---|---|---|---|---|---|---|---|
| 4 |   |   |   | 0 |   |   | 2 |
| 0 | 0 | 0 | 0 | 0 | 0 | 0 | 0 |

|   |   |   |   |   |   |   |   |
|---|---|---|---|---|---|---|---|
| 0 | 0 | 0 | 0 | 0 | 0 | 0 | 0 |
| 0 | 0 | 0 | 0 | 0 | 0 | 0 | 0 |
| 3 |   | 3 | 0 | 0 | 0 |   |   |

|   |   |   |   |   |   |   |   |
|---|---|---|---|---|---|---|---|
| 0 | 0 | 0 | 0 | 0 | 0 | 0 | 0 |
| 0 | 0 | 0 | 0 | 0 | 0 | 0 | 0 |

|   |   |   |   |   |   |      |   |
|---|---|---|---|---|---|------|---|
| 0 | 0 | 0 | 0 | 0 | 0 | 1.18 | 0 |
| 0 | 0 | 0 | 0 | 0 | 0 | 0    | 0 |
| 0 | 0 | 0 | 0 | 0 | 0 | 0    | 0 |

|      |   |     |   |      |   |    |   |
|------|---|-----|---|------|---|----|---|
| 1.48 | 0 | 0.4 | 0 | 1.78 | 0 | 15 | 0 |
| 0    | 0 | 0   | 0 | 0    | 0 | 0  | 0 |
| 0.38 | 0 | 0   | 0 | 0.37 | 0 | 0  | 0 |
| 0    | 0 | 0   | 0 | 0    | 0 | 0  | 0 |

|   |   |   |  |   |  |   |  |
|---|---|---|--|---|--|---|--|
| 0 | 0 | 0 |  | 0 |  | 0 |  |
|---|---|---|--|---|--|---|--|

|   |   |   |   |   |   |      |     |
|---|---|---|---|---|---|------|-----|
| 0 | 0 | 0 |   | 0 |   | 0    | 0.6 |
| 0 | 0 | 0 | 0 | 0 | 0 | 0.54 | 0   |

|      |   |   |   |     |   |   |      |
|------|---|---|---|-----|---|---|------|
| 2.17 | 0 | 0 | 0 | 3.2 |   | 0 | 0.75 |
| 0    | 0 | 0 | 0 | 0   | 0 | 0 | 0    |

|   |   |   |   |   |   |   |   |
|---|---|---|---|---|---|---|---|
| 0 | 0 | 0 | 0 | 0 | 0 | 0 | 0 |
| 0 | 0 | 0 | 0 | 0 | 0 | 0 | 0 |

|      |     |      |   |      |   |   |   |
|------|-----|------|---|------|---|---|---|
| 0    | 0   | 0    | 0 | 0    | 0 | 0 | 0 |
| 1.05 | 0.6 | 0.49 | 0 | 2.41 | 0 | 0 | 0 |

|   |   |   |   |   |   |   |   |
|---|---|---|---|---|---|---|---|
| 0 | 0 | 0 | 0 | 0 | 0 | 0 | 0 |
| 0 | 0 | 0 | 0 | 0 | 0 | 0 | 0 |
| 0 | 0 | 0 | 0 | 0 | 0 | 0 | 0 |
| 0 | 0 | 0 | 0 | 0 | 0 | 0 | 0 |

|   |   |   |   |   |   |   |   |
|---|---|---|---|---|---|---|---|
| 0 | 0 | 0 | 0 | 0 | 0 | 0 | 0 |
|---|---|---|---|---|---|---|---|

|      |   |   |   |   |   |   |   |
|------|---|---|---|---|---|---|---|
| 0.45 | 0 | 0 | 0 | 0 | 0 | 0 | 0 |
|------|---|---|---|---|---|---|---|

|      |      |      |   |      |      |   |      |
|------|------|------|---|------|------|---|------|
| 0.8  | 0    | 0    | 0 | 0    | 0    | 0 | 0.38 |
| 1.14 | 0.54 | 3.99 | 0 | 0.57 | 0.37 | 0 | 0    |
| 0    | 2.09 | 0    |   | 0    | 0    | 0 | 0    |
| 0    | 0    | 0    | 0 | 0    | 0    | 0 | 0    |

|   |      |   |   |   |   |   |   |
|---|------|---|---|---|---|---|---|
| 0 | 4.52 | 0 | 0 | 0 | 0 | 0 | 0 |
|---|------|---|---|---|---|---|---|

|      |   |   |   |   |   |   |   |
|------|---|---|---|---|---|---|---|
| 0.43 | 0 | 0 | 0 | 0 | 0 | 0 | 0 |
|------|---|---|---|---|---|---|---|

|   |   |   |   |   |   |   |   |
|---|---|---|---|---|---|---|---|
| 0 | 0 | 0 | 0 | 0 | 0 | 0 | 0 |
|---|---|---|---|---|---|---|---|

|      |      |      |      |      |      |   |      |
|------|------|------|------|------|------|---|------|
| 68.7 | 3.25 | 22.2 | 43.6 | 42.9 | 7.58 | 0 | 6.23 |
| 0    | 0    | 0    | 0    | 0    | 0    | 0 | 0    |

|      |      |      |  |      |      |  |  |
|------|------|------|--|------|------|--|--|
| 3.46 | 78.2 | 12.7 |  | 22.4 | 1.74 |  |  |
|------|------|------|--|------|------|--|--|

|      |      |     |      |      |   |   |      |
|------|------|-----|------|------|---|---|------|
| 2.52 | 3.37 | 3.6 | 0.82 | 2.89 |   | 0 | 0.36 |
| 0    | 1.61 | 0   | 0    | 0    | 0 | 0 | 0    |

|      |   |   |   |   |   |   |   |
|------|---|---|---|---|---|---|---|
| 2.74 | 0 | 0 | 0 | 0 | 0 | 0 | 0 |
| 7.93 | 0 | 0 | 0 | 0 | 0 | 0 | 0 |

|      |   |   |   |   |   |   |   |
|------|---|---|---|---|---|---|---|
| 0.59 | 0 | 0 | 0 | 0 | 0 | 0 | 0 |
| 0    | 0 | 0 | 0 | 0 | 0 | 0 | 0 |

|     |      |   |   |      |   |   |   |
|-----|------|---|---|------|---|---|---|
| 1.3 | 0    | 0 | 0 | 0    | 0 | 0 | 0 |
| 0   | 1.51 | 0 | 0 | 0.59 | 0 | 0 | 0 |

|      |      |      |   |      |   |   |      |
|------|------|------|---|------|---|---|------|
| 2.98 | 3.95 | 2.56 |   | 5.33 |   |   | 2.55 |
| 0    | 0    | 0    | 0 | 0    | 0 | 0 | 0    |
| 0    | 0    | 0    | 0 | 0    | 0 | 0 | 0    |
| 0    | 0    | 0    | 0 | 0    | 0 | 0 | 0    |
| 0    | 0    | 0    | 0 | 0    | 0 | 0 | 0    |

|      |      |      |      |      |  |      |  |
|------|------|------|------|------|--|------|--|
| 13.5 | 2.31 | 1.58 | 1.02 | 40.5 |  | 4.86 |  |
|------|------|------|------|------|--|------|--|

|      |      |   |   |      |   |   |   |
|------|------|---|---|------|---|---|---|
| 0    | 0    | 0 | 0 | 0    | 0 | 0 | 0 |
| 0    | 0    | 0 | 0 | 0    | 0 | 0 | 0 |
| 0.41 | 1.03 | 0 | 0 | 2.25 | 0 | 0 | 0 |
| 0    | 2.13 | 0 | 0 | 0    | 0 | 0 | 0 |

|   |   |   |   |      |   |   |   |
|---|---|---|---|------|---|---|---|
| 0 | 0 | 0 | 0 | 1.49 | 0 | 0 | 0 |
| 0 | 0 | 0 | 0 | 0    | 0 | 0 | 0 |

|  |  |  |  |  |  |  |  |
|--|--|--|--|--|--|--|--|
|  |  |  |  |  |  |  |  |
|--|--|--|--|--|--|--|--|

|      |      |   |   |   |   |   |   |
|------|------|---|---|---|---|---|---|
| 0.49 | 1.44 | 0 | 0 | 0 | 0 | 0 | 0 |
|------|------|---|---|---|---|---|---|

|      |      |      |      |      |      |   |   |     |
|------|------|------|------|------|------|---|---|-----|
| 0    | 0    | 0    | 0    | 0    | 0    | 0 | 0 | 0   |
| 1.7  | 2.23 | 0    | 0    | 0    | 0    | 0 | 0 |     |
| 0    |      | 0    | 0 0  |      | 0    | 0 |   |     |
| 4.34 | 0.43 | 3.31 | 0    | 5.28 | 1.43 | 0 | 0 |     |
| 0    | 0    | 0    | 0    | 0    | 0    | 0 | 0 |     |
| 6.31 | 0.44 | 0.47 | 0    | 0    | 0    | 0 | 0 |     |
| 3.9  | 0    | 1.35 | 0    | 1.26 | 0    | 0 | 0 |     |
| 0    | 0    | 0    | 0    | 0    | 0    | 0 | 0 |     |
| 0    | 0    | 0    | 0    | 0    | 0    | 0 | 0 |     |
| 0    | 0    | 0    | 0    | 0    | 0    | 0 | 0 |     |
| 0    | 0    | 0    | 0    | 0    | 0    | 0 | 0 | 0   |
| 0    | 0    | 0    | 0    | 0    | 0    | 0 | 0 | 0   |
| 0    | 0.99 | 0    | 0.44 | 0    | 0    | 0 | 0 | 100 |
| 0    | 0    | 0    | 0    | 0    | 0    | 0 | 0 |     |
| 0    | 0    | 0    | 0    | 0    | 0    | 0 | 0 |     |

|   |   |   |   |   |   |   |   |
|---|---|---|---|---|---|---|---|
| 0 | 0 | 0 | 0 | 0 | 0 | 0 | 0 |
| 0 | 0 | 0 | 0 | 0 | 0 | 0 | 0 |

|      |   |      |   |     |     |   |   |
|------|---|------|---|-----|-----|---|---|
| 1.65 | 0 | 4.67 | 0 | 0.9 | 0.6 | 0 | 0 |
|------|---|------|---|-----|-----|---|---|

|      |      |      |   |     |   |   |   |
|------|------|------|---|-----|---|---|---|
| 6.55 | 17.5 | 0.78 | 0 | 5.4 |   |   |   |
| 0    | 0    | 0    | 0 | 0   | 0 | 0 | 0 |
| 0    | 0    | 0    | 0 | 0   | 0 | 0 | 0 |

|   |   |   |   |   |   |   |   |
|---|---|---|---|---|---|---|---|
| 0 | 0 | 0 | 0 | 0 | 0 | 0 | 0 |
|---|---|---|---|---|---|---|---|

|   |   |   |   |   |   |   |   |
|---|---|---|---|---|---|---|---|
| 0 | 0 | 0 | 0 | 0 | 0 | 0 | 0 |
| 0 | 0 | 0 | 0 | 0 | 0 | 0 | 0 |

|   |   |   |   |   |   |   |   |
|---|---|---|---|---|---|---|---|
| 0 | 0 | 0 | 0 | 0 | 0 | 0 | 0 |
|---|---|---|---|---|---|---|---|

|   |   |   |   |   |   |   |   |
|---|---|---|---|---|---|---|---|
| 0 | 0 | 0 | 0 | 0 | 0 | 0 | 0 |
|---|---|---|---|---|---|---|---|

|      |   |      |   |      |      |      |   |
|------|---|------|---|------|------|------|---|
| 0    | 0 | 0    | 0 | 0    | 0    | 1.17 | 0 |
| 0    | 0 | 0    | 0 | 5.21 | 0    | 0    | 0 |
| 0.54 | 0 | 0    | 0 | 0    | 0    | 0    | 0 |
| 0    | 0 | 0    | 0 | 0    | 0    | 0    | 0 |
| 0    | 0 | 0    | 0 | 0    | 0    | 0    | 0 |
| 0    | 0 | 0    | 0 | 0    | 0    | 0    | 0 |
| 13.7 | 0 | 0.57 | 0 | 5.27 | 0.65 | 0    | 0 |

|      |   |     |   |      |   |   |   |
|------|---|-----|---|------|---|---|---|
| 0.65 | 0 | 3.3 | 0 | 0.43 | 0 | 0 | 0 |
|------|---|-----|---|------|---|---|---|

|      |      |      |      |      |      |   |   |
|------|------|------|------|------|------|---|---|
| 5.86 | 0.38 | 4.89 | 4.98 | 1.42 | 0.88 | 0 | 0 |
| 0    | 0    | 0    | 0    | 0    | 0    | 0 | 0 |
| 0    | 0    | 0    | 0    | 0    |      | 0 | 0 |



| ダニ2<br>mite2 | 総IgE2<br>IgE2 | 検査時年齢<br>agerast3 | 卵3<br>egg3 | 牛乳3<br>milk3 | 小麦3<br>wheat3 | ピーナツ3<br>peanut3 | 大豆3<br>soybean3 | 米3<br>rice3 |
|--------------|---------------|-------------------|------------|--------------|---------------|------------------|-----------------|-------------|
| 0            |               | 18                | 2.78       | 3.23         | 0             | 0                | 0               |             |
| 0            |               | 28                | 0          | 0            | 0             | 0                | 0               | 0           |
| 0            | 60            |                   |            |              |               |                  |                 |             |
| 0            |               | 22                | 0.73       | 0            | 0.6           | 0                | 0               | 0.39        |
| 0            |               | 20                | 2.21       | 0            | 0             | 0                | 0               | 0           |
| 0            | 212           | 20                | 5          |              | 5             |                  |                 |             |
| 0            |               | 36                | 0          | 0            | 0             | 0                | 0               |             |
|              |               |                   |            |              |               |                  |                 |             |
| 0            | 39            | 18                | 0          | 0            | 0             | 0                | 0               | 0           |
|              |               | 11                | 5          | 2            | 6             |                  | 4               |             |
| 0            | 63            |                   |            |              |               |                  |                 |             |
| 0            |               | 23                | 0          | 0            | 0             | 0                | 0               | 0           |
| 1.24         |               | 29                | 0.53       | 0            | 0             | 0                | 0               | 0           |
| 0            | 71            |                   |            |              |               |                  |                 |             |
| 0            |               | 17                | 1.36       | 0            | 0             | 0                | 0               | 0           |
| 68.8         | 268           |                   |            |              |               |                  |                 |             |
| 3.83         | 17            |                   |            |              |               |                  |                 |             |
|              |               |                   |            |              |               |                  |                 |             |
| 0.99         |               |                   |            |              |               |                  |                 |             |
|              |               |                   |            |              |               |                  |                 |             |
| 0            | 8             |                   |            |              |               |                  |                 |             |
|              |               |                   |            |              |               |                  |                 |             |
| 0.58         | 16            |                   |            |              |               |                  |                 |             |
|              |               |                   |            |              |               |                  |                 |             |
| 100          |               |                   |            |              |               |                  |                 |             |
| 0            | 22            |                   |            |              |               |                  |                 |             |
|              |               |                   |            |              |               |                  |                 |             |
|              | 40            | 17                | 6.77       | 0            | 0             | 0                | 0               | 0           |
| 0            | 2             |                   |            |              |               |                  |                 |             |
|              |               |                   |            |              |               |                  |                 |             |
|              | 7             |                   |            |              |               |                  |                 |             |
| 7.27         |               | 27                | 0          | 0            | 0             | 0                | 0               | 0           |
|              |               |                   |            |              |               |                  |                 |             |
| 0            |               |                   |            |              |               |                  |                 |             |
| 0            | 6             |                   |            |              |               |                  |                 |             |
| 5            |               | 57                | 0          | 0.42         | 0             | 0                | 0               | 0           |
| 0            | 81            | 19                | 0          | 0            | 0             | 0                | 0               | 0           |
|              |               |                   |            |              |               |                  |                 |             |
| 0            |               | 21                | 0.45       | 0            | 0             | 0                | 0               | 0           |
|              |               |                   |            |              |               |                  |                 |             |
|              |               |                   |            |              |               |                  |                 |             |
| 0            |               |                   |            |              |               |                  |                 |             |

|   |      |    |      |      |   |      |   |   |
|---|------|----|------|------|---|------|---|---|
|   |      | 15 | 16.9 | 1.42 | 0 | 0    | 0 | 0 |
|   | 1214 |    |      |      |   |      |   |   |
| 0 |      | 24 | 4.17 | 0    | 0 | 0.63 | 0 |   |
| 0 |      |    |      |      |   |      |   |   |

|   |  |  |  |  |  |  |  |  |
|---|--|--|--|--|--|--|--|--|
| 0 |  |  |  |  |  |  |  |  |
|   |  |  |  |  |  |  |  |  |

|      |      |    |      |      |      |      |      |      |
|------|------|----|------|------|------|------|------|------|
| 0    | 56   |    |      |      |      |      |      |      |
|      |      | 29 | 100  | 5.73 | 100  | 3.07 | 15   | 39.8 |
| 0    | 0    | 21 | 2.01 | 0    | 0    | 0    | 0    | 0    |
| 0    |      | 27 | 68.3 | 0.93 |      | 19.5 |      | 12   |
| 21.7 | 1342 | 40 | 6.43 | 10.1 | 1    | 1.77 | 1.23 | 0.5  |
| 5.38 |      | 24 | 1.27 | 0    | 1    | 0    | 0    | 0    |
| 20.6 |      | 24 | 20.8 | 13.4 | 12.2 | 0    | 0    | 0    |

|   |  |  |  |  |  |  |  |  |
|---|--|--|--|--|--|--|--|--|
| 0 |  |  |  |  |  |  |  |  |
|---|--|--|--|--|--|--|--|--|

|      |    |    |      |      |      |      |      |      |
|------|----|----|------|------|------|------|------|------|
| 2.92 |    | 24 | 13.4 | 1.05 | 6.49 | 5.65 | 5.49 | 7.83 |
| 0    |    |    |      |      |      |      |      |      |
| 0    |    |    |      |      |      |      |      |      |
|      | 18 |    |      |      |      |      |      |      |
| 0    | 10 |    |      |      |      |      |      |      |
| 0    | 4  |    |      |      |      |      |      |      |

|   |    |    |      |      |     |      |   |   |
|---|----|----|------|------|-----|------|---|---|
| 0 |    |    |      |      |     |      |   |   |
| 0 | 63 | 20 | 1.4  | 0.82 | 0   | 0    | 0 | 0 |
|   |    | 29 | 26.8 | 0.53 | 0.8 | 0    | 0 | 0 |
| 0 |    | 15 | 14   | 1.65 | 0   | 1.57 | 0 | 0 |

|      |  |    |      |   |   |   |   |   |
|------|--|----|------|---|---|---|---|---|
| 0    |  | 22 | 1.25 | 0 | 0 | 0 | 0 | 0 |
| 0.99 |  | 36 | 0.91 | 0 | 0 | 0 | 0 | 0 |

|  |  |    |      |  |  |  |  |  |
|--|--|----|------|--|--|--|--|--|
|  |  | 23 | 9.87 |  |  |  |  |  |
|--|--|----|------|--|--|--|--|--|

|      |  |    |      |      |      |      |      |      |
|------|--|----|------|------|------|------|------|------|
| 0    |  | 16 | 0.96 | 0    | 0    | 0    | 0    | 0    |
| 1275 |  | 11 | 100  | 23.6 | 27   | 26   | 5.33 | 1    |
|      |  | 29 | 2.88 | 0.66 | 0.77 | 0.45 | 0.45 | 0.53 |

|   |  |    |    |      |      |      |   |  |
|---|--|----|----|------|------|------|---|--|
| 0 |  | 29 | 22 | 0.56 | 3.25 | 4.83 | 0 |  |
| 0 |  |    |    |      |      |      |   |  |

|      |  |  |  |  |  |  |  |  |
|------|--|--|--|--|--|--|--|--|
| 127  |  |  |  |  |  |  |  |  |
| 1.25 |  |  |  |  |  |  |  |  |

|     |   |    |      |   |   |     |   |      |
|-----|---|----|------|---|---|-----|---|------|
| 100 |   | 31 | 0.56 | 0 | 0 | 0.7 | 0 | 0.42 |
| 0   | 4 |    |      |   |   |     |   |      |

|   |   |  |  |  |  |  |  |  |
|---|---|--|--|--|--|--|--|--|
| 0 |   |  |  |  |  |  |  |  |
| 0 | 3 |  |  |  |  |  |  |  |

|     |  |    |      |   |   |   |   |   |
|-----|--|----|------|---|---|---|---|---|
| 0   |  | 19 | 0.93 | 0 | 0 | 0 | 0 | 0 |
| 2.5 |  |    |      |   |   |   |   |   |

|   |    |    |      |     |     |     |   |  |
|---|----|----|------|-----|-----|-----|---|--|
| 0 | 12 | 16 | 14.2 | 2.5 | 1.7 | 9.4 | 0 |  |
| 0 |    | 18 | 0.37 | 0   | 0   | 0   | 0 |  |

|   |    |  |  |  |  |  |  |  |
|---|----|--|--|--|--|--|--|--|
| 0 | 43 |  |  |  |  |  |  |  |
|---|----|--|--|--|--|--|--|--|

|   |  |    |      |      |   |   |   |  |
|---|--|----|------|------|---|---|---|--|
| 0 |  | 17 | 3.69 | 3.43 | 0 | 0 | 0 |  |
|---|--|----|------|------|---|---|---|--|

|   |  |  |  |  |  |  |  |  |
|---|--|--|--|--|--|--|--|--|
| 1 |  |  |  |  |  |  |  |  |
|---|--|--|--|--|--|--|--|--|

|   |  |  |  |  |  |  |  |  |
|---|--|--|--|--|--|--|--|--|
| 0 |  |  |  |  |  |  |  |  |
|---|--|--|--|--|--|--|--|--|

|    |  |    |      |      |      |   |      |   |
|----|--|----|------|------|------|---|------|---|
| 98 |  |    |      |      |      |   |      |   |
| 0  |  |    |      |      |      |   |      |   |
| 0  |  |    |      |      |      |   |      |   |
|    |  | 15 | 1.82 | 0.39 | 13.7 | 0 | 0.57 | 0 |

|   |    |    |      |      |      |   |   |   |
|---|----|----|------|------|------|---|---|---|
|   |    | 25 | 2.74 | 4.51 | 0.37 | 0 | 0 | 0 |
| 0 | 26 |    |      |      |      |   |   |   |

|      |  |    |      |      |      |     |   |   |
|------|--|----|------|------|------|-----|---|---|
| 11.2 |  | 15 | 2.96 | 0.76 | 0.55 | 1.3 |   | 0 |
| 0    |  | 21 | 0.99 | 0    | 0    | 0   | 0 |   |

|  |     |    |      |      |   |  |   |   |
|--|-----|----|------|------|---|--|---|---|
|  | 200 | 24 | 47.6 | 0.58 | 0 |  | 0 | 0 |
|--|-----|----|------|------|---|--|---|---|

|  |  |  |  |  |  |  |  |  |
|--|--|--|--|--|--|--|--|--|
|  |  |  |  |  |  |  |  |  |
|--|--|--|--|--|--|--|--|--|

|  |    |  |  |  |  |  |  |  |
|--|----|--|--|--|--|--|--|--|
|  | 51 |  |  |  |  |  |  |  |
|  |    |  |  |  |  |  |  |  |

|   |     |  |  |  |  |  |  |  |
|---|-----|--|--|--|--|--|--|--|
| 0 | 482 |  |  |  |  |  |  |  |
| 0 | 356 |  |  |  |  |  |  |  |

|   |    |    |   |   |   |   |   |   |
|---|----|----|---|---|---|---|---|---|
| 0 |    |    |   |   |   |   |   |   |
| 0 | 18 | 19 | 0 | 0 | 0 | 0 | 0 | 0 |

| ゴマ3     | そば3       | えび3     | いわし3     | ハウスダスト3    | ダニ3   | 総IgE3 | 検査時年     | 卵4   |
|---------|-----------|---------|----------|------------|-------|-------|----------|------|
| sesame3 | buckwheat | shrimp3 | sardine3 | housedust3 | mite3 | IgE3  | agerast4 | egg4 |
| 4.89    |           |         | 0        |            |       | 0     | 110      |      |
| 0       | 0         |         | 0 0.35E  |            |       | 0     |          |      |
| 0       | 0         | 0       | 0        |            | 0     |       |          |      |
| 0       | 0         | 0       | 0        |            |       |       | 26       | 3.6  |
| 0       |           | 0       |          | 4          | 3     | 503   | 22       | 82.8 |
|         |           |         |          | 2.53       | 3.11  |       |          |      |
| 0       | 0         | 0       | 0        |            | 0     | 65    |          |      |
|         |           |         |          | 2          | 2     |       | 35       | 26.7 |
| 0       | 0         | 0       | 0        |            | 0     | 10    |          |      |
| 0       | 0         | 1.26    | 0        |            | 1.26  | 75    |          |      |
| 0       | 0         | 0       | 0        |            | 0     |       | 25       | 0.57 |
|         |           |         |          |            |       |       |          |      |
|         |           |         |          |            |       |       |          |      |
|         |           |         |          |            |       |       |          |      |
|         |           |         |          |            |       |       |          |      |
| 0       | 0         | 0       | 0        |            |       |       |          |      |
|         |           |         |          |            |       |       |          |      |
| 0.44    | 0         | 0       | 0        | 5.79       | 6.27  | 148   |          |      |
|         |           |         |          |            |       |       |          |      |
|         |           |         |          |            |       |       |          |      |
| 0       | 0         | 0       | 0        | 100        | 97    |       | 77       | 0    |
| 0       | 0         | 0       | 0        |            | 0     |       |          |      |
| 0       | 0         | 0       | 0        |            | 0     | 259   |          |      |
|         |           |         |          |            |       |       |          |      |



|      |      |   |      |      |
|------|------|---|------|------|
| 0    | 0    | 0 | 0    |      |
| 1.15 | 0.44 | 0 | 2.09 |      |
| 1.09 | 0.48 | 0 | 0    | 1.86 |

|   |  |  |      |        |      |
|---|--|--|------|--------|------|
| 0 |  |  | 3.47 | 2歳11ヶ月 | 20.6 |
|   |  |  |      |        |      |

|   |   |   |     |     |  |
|---|---|---|-----|-----|--|
|   |   |   |     |     |  |
| 0 | 0 | 0 | 100 | 100 |  |

|  |  |  |  |  |  |
|--|--|--|--|--|--|
|  |  |  |  |  |  |
|--|--|--|--|--|--|

|   |   |   |   |   |  |
|---|---|---|---|---|--|
| 0 | 0 | 0 | 0 | 0 |  |
|---|---|---|---|---|--|

|      |  |      |   |   |        |
|------|--|------|---|---|--------|
|      |  |      |   |   |        |
| 9.87 |  | 0.48 | 0 |   | 1歳11ヶ月 |
| 0    |  | 0    |   | 0 | 3.14   |

|  |  |  |  |  |  |
|--|--|--|--|--|--|
|  |  |  |  |  |  |
|--|--|--|--|--|--|

|   |   |   |   |  |        |
|---|---|---|---|--|--------|
| 0 | 0 | 0 | 0 |  | 1歳11ヶ月 |
|   |   |   |   |  | 3.19   |

|  |  |  |  |  |  |
|--|--|--|--|--|--|
|  |  |  |  |  |  |
|--|--|--|--|--|--|

|  |  |  |  |  |  |
|--|--|--|--|--|--|
|  |  |  |  |  |  |
|--|--|--|--|--|--|

|  |  |  |  |  |  |
|--|--|--|--|--|--|
|  |  |  |  |  |  |
|  |  |  |  |  |  |

|      |      |   |   |      |  |
|------|------|---|---|------|--|
|      |      |   |   |      |  |
| 5.27 | 0.65 | 0 | 0 | 1.16 |  |

|  |  |  |  |  |  |
|--|--|--|--|--|--|
|  |  |  |  |  |  |
|--|--|--|--|--|--|

|   |  |   |   |      |      |
|---|--|---|---|------|------|
| 0 |  | 0 | 0 | 0.67 | 0.83 |
|   |  |   |   |      |      |

|   |   |   |      |      |       |      |  |
|---|---|---|------|------|-------|------|--|
| 0 | 0 | 0 | 0.41 | 19.2 | 191   |      |  |
| 0 |   |   |      | 1.81 | 2歳4ヶ月 | 0.86 |  |

|  |  |  |      |   |    |  |    |
|--|--|--|------|---|----|--|----|
|  |  |  | 0.61 | 0 | 3歳 |  | 27 |
|--|--|--|------|---|----|--|----|

|  |  |  |  |  |  |  |  |
|--|--|--|--|--|--|--|--|
|  |  |  |  |  |  |  |  |
|  |  |  |  |  |  |  |  |

|   |   |   |   |  |  |    |  |
|---|---|---|---|--|--|----|--|
| 0 | 0 | 0 | 0 |  |  | 21 |  |
|---|---|---|---|--|--|----|--|

|       |        |         |          |       |         |           |         |          |
|-------|--------|---------|----------|-------|---------|-----------|---------|----------|
| 牛乳4   | 小麦4    | ピーナツ4   | 大豆4      | 米4    | ゴマ4     | そば4       | えび4     | いわし4     |
| milk4 | wheat4 | peanut4 | soybean4 | rice4 | sesame4 | buckwheat | shrimp4 | sardine4 |

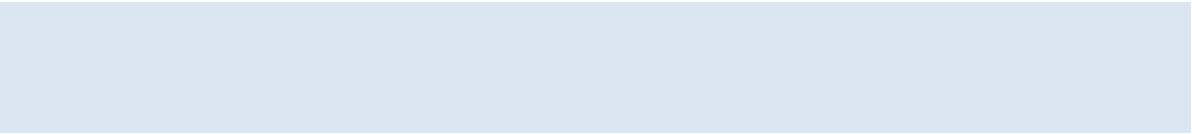

|   |      |   |   |   |   |   |   |   |
|---|------|---|---|---|---|---|---|---|
| 0 | 0.38 | 0 | 0 | 0 | 0 | 0 | 0 | 0 |
|---|------|---|---|---|---|---|---|---|

|   |      |    |     |      |      |      |  |      |
|---|------|----|-----|------|------|------|--|------|
| 0 | 78.6 | 24 | 5.9 | 1.29 | 14.8 | 2.63 |  | 0.38 |
|---|------|----|-----|------|------|------|--|------|

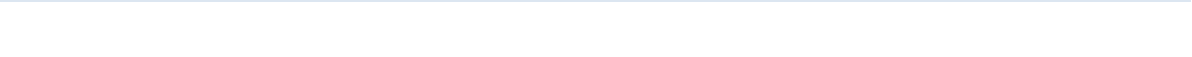

|      |      |      |      |  |      |  |      |      |
|------|------|------|------|--|------|--|------|------|
| 8.26 | 35.4 | 16.3 | 13.5 |  | 15.4 |  | 2.03 | 9.84 |
|------|------|------|------|--|------|--|------|------|

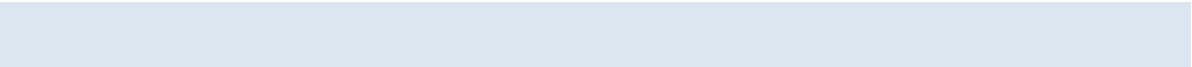

|   |   |   |   |   |   |   |  |  |
|---|---|---|---|---|---|---|--|--|
| 0 | 0 | 0 | 0 | 0 | 0 | 0 |  |  |
|---|---|---|---|---|---|---|--|--|

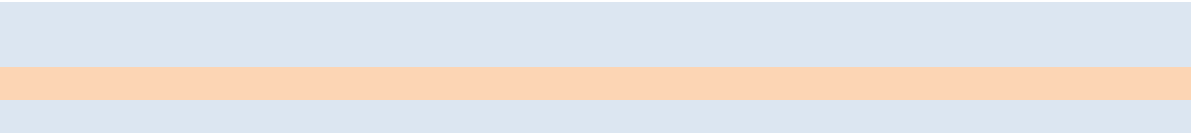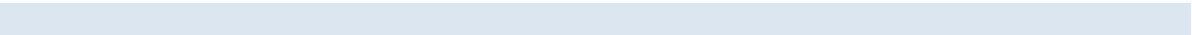

|   |   |   |   |   |   |   |   |   |
|---|---|---|---|---|---|---|---|---|
| 0 | 0 | 0 | 0 | 0 | 0 | 0 | 0 | 0 |
|---|---|---|---|---|---|---|---|---|

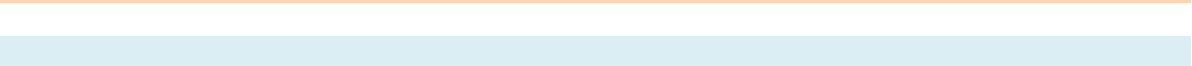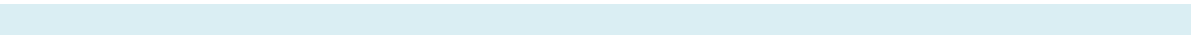

|      |   |   |   |  |   |  |  |   |
|------|---|---|---|--|---|--|--|---|
| 1.35 | 0 | 0 | 0 |  | 0 |  |  | 0 |
|------|---|---|---|--|---|--|--|---|

|      |   |   |   |  |   |   |   |   |
|------|---|---|---|--|---|---|---|---|
| 0.38 | 0 | 0 | 0 |  | 0 | 0 | 0 | 0 |
|------|---|---|---|--|---|---|---|---|

|  |  |  |  |  |  |  |  |  |
|--|--|--|--|--|--|--|--|--|
|  |  |  |  |  |  |  |  |  |
|--|--|--|--|--|--|--|--|--|

|  |  |  |  |  |  |  |  |  |
|--|--|--|--|--|--|--|--|--|
|  |  |  |  |  |  |  |  |  |
|--|--|--|--|--|--|--|--|--|

|  |  |  |  |  |  |  |  |  |
|--|--|--|--|--|--|--|--|--|
|  |  |  |  |  |  |  |  |  |
|--|--|--|--|--|--|--|--|--|

|      |      |      |      |    |      |      |      |      |
|------|------|------|------|----|------|------|------|------|
| 5.91 | 86.8 | 9.16 | 20.9 | 41 | 74.2 | 8.58 | 4.62 | 17.4 |
|------|------|------|------|----|------|------|------|------|

|      |      |      |      |      |      |      |   |      |
|------|------|------|------|------|------|------|---|------|
| 1.43 | 0.84 | 10.4 | 2.42 | 0.65 | 7.21 | 1.12 | 0 | 0.67 |
|------|------|------|------|------|------|------|---|------|

|      |     |      |      |      |      |  |   |   |
|------|-----|------|------|------|------|--|---|---|
| 18.3 | 1.6 | 2.07 | 1.34 | 1.23 | 3.32 |  | 0 | 0 |
|------|-----|------|------|------|------|--|---|---|

|      |      |   |   |   |      |   |  |  |
|------|------|---|---|---|------|---|--|--|
| 0    | 0.97 | 0 | 0 | 0 | 0    | 0 |  |  |
| 10.9 | 7.03 | 0 | 0 | 0 | 0.52 | 0 |  |  |

|  |  |  |  |  |  |  |  |  |
|--|--|--|--|--|--|--|--|--|
|  |  |  |  |  |  |  |  |  |
|--|--|--|--|--|--|--|--|--|

|   |      |     |      |      |      |     |   |   |
|---|------|-----|------|------|------|-----|---|---|
| 0 | 5.04 | 5.1 | 4.81 | 6.17 | 6.72 | 5.1 | 0 | 0 |
|---|------|-----|------|------|------|-----|---|---|

|  |  |  |  |  |  |  |  |  |
|--|--|--|--|--|--|--|--|--|
|  |  |  |  |  |  |  |  |  |
|--|--|--|--|--|--|--|--|--|

|  |  |  |  |  |  |  |  |  |
|--|--|--|--|--|--|--|--|--|
|  |  |  |  |  |  |  |  |  |
|--|--|--|--|--|--|--|--|--|

|  |  |  |  |  |  |  |  |  |
|--|--|--|--|--|--|--|--|--|
|  |  |  |  |  |  |  |  |  |
|--|--|--|--|--|--|--|--|--|

|      |      |      |      |      |      |      |      |   |
|------|------|------|------|------|------|------|------|---|
| 0.62 | 0.98 | 0.48 | 0.73 | 3.46 | 8.22 | 0.86 | 1.03 | 0 |
|------|------|------|------|------|------|------|------|---|

|  |
|--|
|  |
|  |

|   |      |      |
|---|------|------|
| 0 | 1.96 | 2.73 |
|   |      |      |

|  |
|--|
|  |
|--|

|  |
|--|
|  |
|  |

|  |
|--|
|  |
|--|

|  |
|--|
|  |
|--|

|  |
|--|
|  |
|--|

|      |   |      |   |  |     |      |   |   |
|------|---|------|---|--|-----|------|---|---|
| 0.65 | 0 | 4.59 | 0 |  | 4.1 | 0.52 | 0 | 0 |
|------|---|------|---|--|-----|------|---|---|

|  |
|--|
|  |
|--|

|      |  |   |      |  |      |  |   |
|------|--|---|------|--|------|--|---|
| 4.22 |  | 0 | 0.36 |  | 0.41 |  | 0 |
|------|--|---|------|--|------|--|---|

|  |
|--|
|  |
|--|

|  |
|--|
|  |
|--|

|  |
|--|
|  |
|  |

|   |   |   |   |   |   |   |
|---|---|---|---|---|---|---|
| 0 | 0 | 0 | 0 | 0 | 0 | 0 |
|---|---|---|---|---|---|---|

|      |   |   |   |   |   |   |   |   |
|------|---|---|---|---|---|---|---|---|
| 0.59 | 0 | 0 | 0 | 0 | 0 | 0 | 0 | 0 |
|------|---|---|---|---|---|---|---|---|

|  |
|--|
|  |
|--|

|  |
|--|
|  |
|  |

ハウスダスト4ダニ4  
housedust4mite4

総IgE4  
IgE4

その他4-1  
other41

その他4-2  
other42

検査時年齢5  
agerast5egg5

卵5  
egg5

牛乳5  
milk5

小麦5  
wheat5

0

鶏肉0.4429100098.3

1001907牛肉3.4143377.4642.3

00

80.697.1410

マグロ、サバ、アジ、0

0

100

100

1399

2865

## 18.2

20.9

38.7

112

193

ネコ1

イヌ2

39

1.71

0

2.49

## 31.9

イヌ48.50

37

4.18

0

0

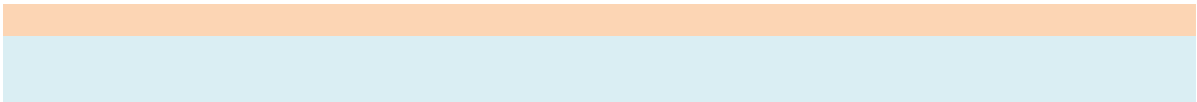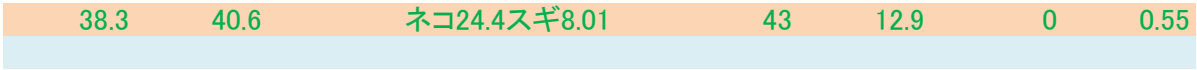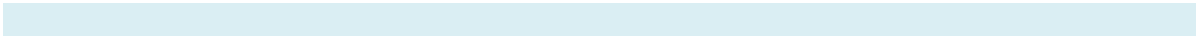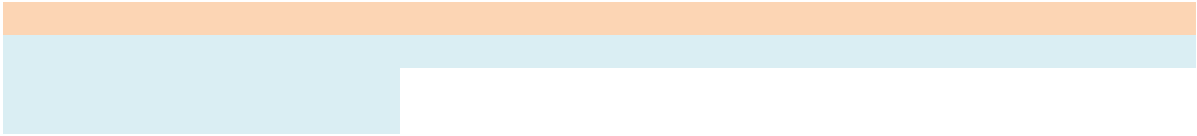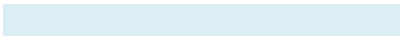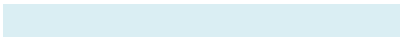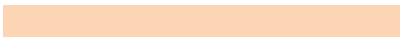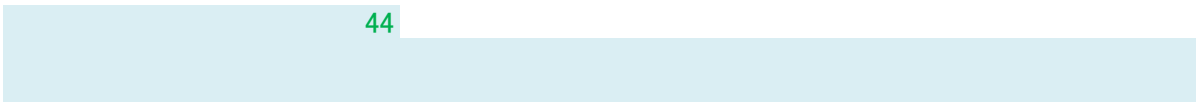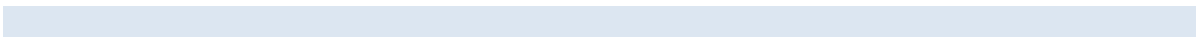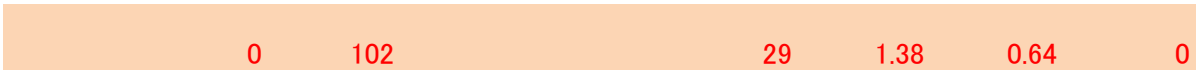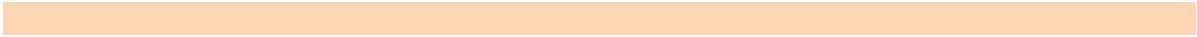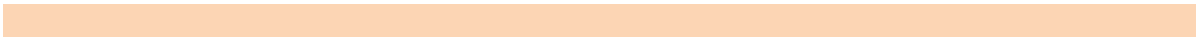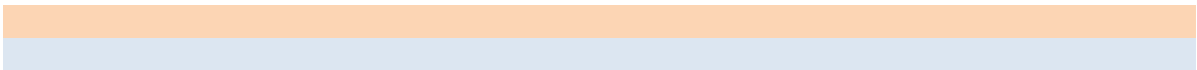

0.6      0.67      132

48      13.1      0

ピーナツ5大豆米ゴマそばえびいわしハウスダストダニ

peanut5soybean5rice5sesame5buckwheat shrimp5sardine5housedust5mite5

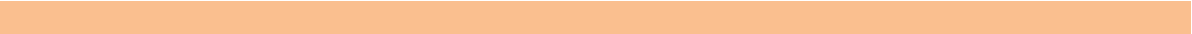

16.71.740.774.770.8722.50.6クラス4クラス4

24.517.44.4615.78.373.5411.9

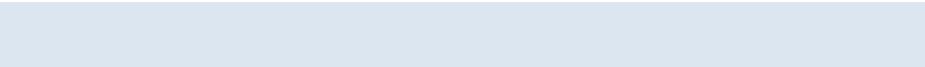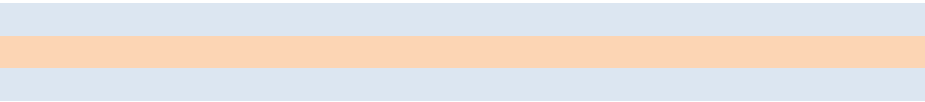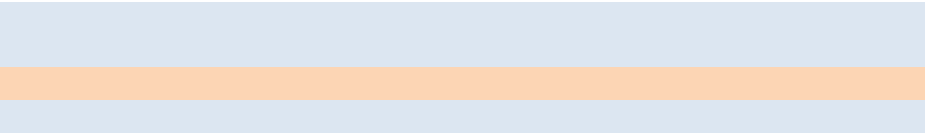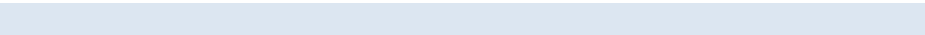

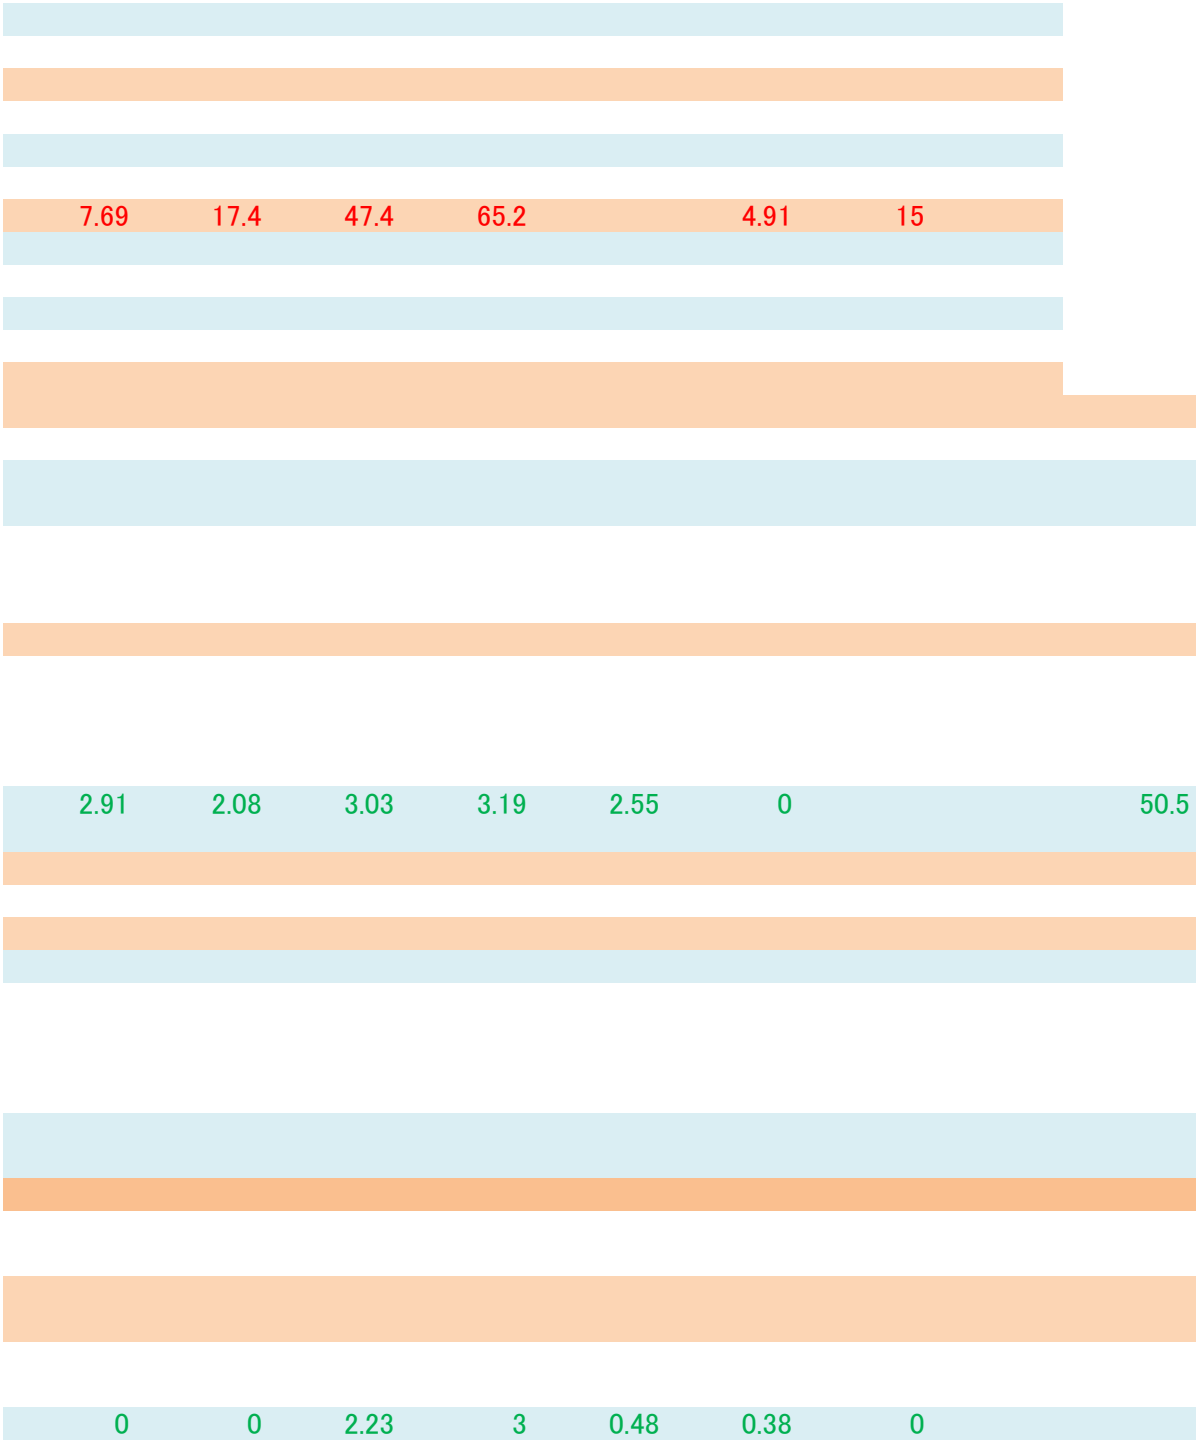

|  |
|--|
|  |
|  |

|      |   |      |   |   |
|------|---|------|---|---|
| 0.64 | 0 | 0.41 | 0 | 0 |
|      |   |      |   |   |

|  |
|--|
|  |
|--|

|  |
|--|
|  |
|  |

|  |
|--|
|  |
|--|

|  |
|--|
|  |
|--|

|   |   |   |  |     |
|---|---|---|--|-----|
| 0 | 0 | 0 |  | 171 |
|---|---|---|--|-----|

|  |
|--|
|  |
|--|

|  |
|--|
|  |
|--|

|  |
|--|
|  |
|  |

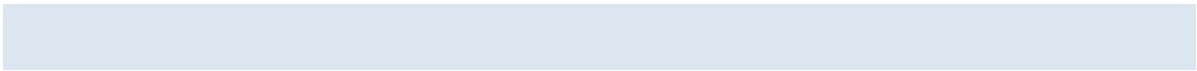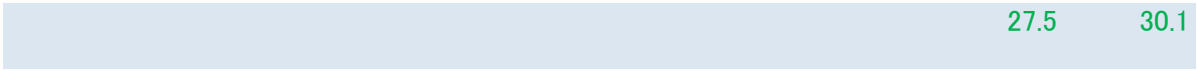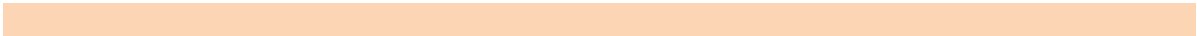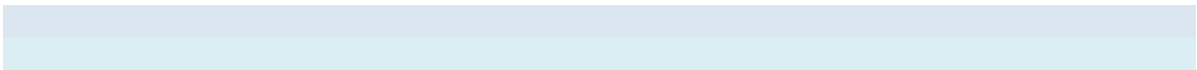

## 2.アレルギー5.出生時0.14.母の飲酒習慣

母喫煙  
現在

妊娠中

総IgE5  
IgE5cesd  
cesdPSS  
PSS

(週)

妊娠中

授乳時期

smokingmcpregsmoki

allergyconipregnancy drinking

1 なし

1 あり

1 なし

なし  
なし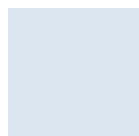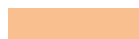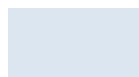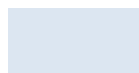

|  |    |    |   |    |   |   |     |      |
|--|----|----|---|----|---|---|-----|------|
|  | 19 | 29 | 2 | 40 | 2 | 2 | 2.0 |      |
|  |    |    | 2 | 39 | 2 | 2 | 2.0 |      |
|  | 13 | 30 | 2 | 40 | 2 | 2 | 2.0 |      |
|  | 0  | 9  | 2 | 39 | 2 | 2 | 2.0 |      |
|  | 3  | 22 | 2 | 38 | 2 | 2 | 2.0 |      |
|  | 13 | 31 | 1 | 38 | 2 | 2 | 2.0 |      |
|  | 5  | 20 | 2 | 39 | 2 | 2 | 2.0 |      |
|  | 1  | 17 | 3 | 36 | 2 | 2 | 2.0 |      |
|  | 7  | 26 | 2 | 39 | 2 | 2 | 2.0 |      |
|  | 7  | 26 | 2 | 40 | 2 | 2 | 2.0 |      |
|  |    |    | 2 | 40 | 2 | 2 | 2.0 |      |
|  | 4  | 17 | 2 | 37 | 2 | 2 | 2.0 |      |
|  | 10 | 23 | 2 | 42 | 2 | 2 | 2.0 |      |
|  | 0  | 22 | 2 | 38 | 2 | 2 | 2.0 |      |
|  | 12 | 26 | 3 | 40 | 2 | 2 | 2.0 |      |
|  | 3  | 8  | 2 | 39 | 2 | 2 | 2.0 |      |
|  | 6  | 25 | 1 | 41 | 2 | 2 | 2.0 |      |
|  | 4  | 25 | 2 | 41 | 2 | 2 | 2.0 |      |
|  |    |    | 2 | 24 | 2 | 2 | 2.0 |      |
|  | 6  | 16 | 1 | 37 | 2 | 2 | 2.0 |      |
|  |    |    | 2 | 41 | 2 | 2 | 2.0 |      |
|  |    |    | 3 | 38 | 2 | 2 | 2.0 |      |
|  |    |    | 2 | 38 | 2 | 2 | 2.0 |      |
|  |    |    | 2 | 40 | 2 | 2 | 2.0 |      |
|  | 22 | 35 | 2 | 36 | 2 | 2 |     | 1 なし |
|  | 22 | 35 | 2 | 36 | 2 | 2 |     | 1 なし |
|  | 5  | 19 | 3 | 37 | 2 | 2 | 2.0 |      |
|  | 5  | 19 | 2 | 37 | 2 | 2 | 2.0 |      |
|  |    |    | 3 | 37 | 2 | 2 | 2.0 |      |
|  | 8  | 20 | 2 | 38 | 2 | 2 | 2.0 |      |
|  | 12 | 29 | 2 | 41 | 2 | 2 | 2.0 |      |
|  | 7  | 19 | 2 | 40 | 2 | 2 | 2.0 |      |
|  |    |    | 2 | 40 | 2 | 2 | 2.0 |      |
|  | 16 | 26 | 2 | 40 | 2 | 2 | 2.0 |      |
|  | 7  | 22 | 2 | 40 | 2 | 2 | 2.0 |      |
|  | 9  | 24 | 2 | 38 | 2 | 2 |     | 1 なし |
|  |    |    | 2 |    | 2 | 2 | 2.0 |      |
|  |    |    | 2 |    | 2 | 2 | 2.0 |      |
|  | 10 | 22 | 2 | 38 | 2 | 2 | 2.0 |      |
|  | 29 | 37 | 3 | 36 | 2 | 2 | 2.0 |      |
|  |    |    | 3 | 41 | 2 | 2 | 2.0 |      |
|  | 11 | 31 | 2 |    | 2 | 2 | 2.0 |      |
|  |    |    | 3 | 40 | 2 | 2 | 2.0 |      |
|  |    |    | 2 | 40 | 2 | 2 |     | 1 なし |
|  |    |    | 3 | 39 | 2 | 2 | 2.0 |      |
|  | 0  | 12 | 2 | 39 | 2 | 2 | 2.0 |      |
|  | 10 | 24 | 2 | 37 | 2 | 2 | 2.0 |      |
|  | 8  | 26 | 2 | 40 | 2 | 2 | 2.0 |      |
|  | 5  | 26 | 2 | 40 | 2 | 2 | 2.0 |      |
|  |    |    | 2 | 37 | 2 | 2 | 2.0 |      |
|  | 8  | 20 | 2 | 41 | 2 | 2 | 2.0 |      |
|  |    |    | 2 | 38 | 2 | 2 | 2.0 |      |
|  | 1  | 20 | 2 | 39 | 2 | 2 | 2.0 |      |
|  | 14 | 31 | 2 | 38 | 2 | 2 | 2.0 |      |
|  | 10 | 39 | 2 | 32 | 2 | 2 | 2.0 |      |
|  | 19 | 29 | 3 | 39 | 2 | 2 | 2.0 |      |
|  | 22 | 29 | 3 | 39 | 2 | 2 | 2.0 |      |
|  |    |    | 2 |    | 2 | 2 | 2.0 |      |
|  | 20 | 30 | 2 | 39 | 2 | 2 | 2.0 |      |

|  |    |    |   |    |   |   |     |      |
|--|----|----|---|----|---|---|-----|------|
|  |    | 29 | 3 | 38 | 2 | 2 | 2.0 |      |
|  | 1  | 24 | 2 | 38 | 2 | 2 | 2.0 |      |
|  | 11 | 21 | 1 | 40 | 2 | 2 | 2.0 | 1 あり |
|  | 21 | 36 | 3 | 39 | 2 | 2 | 2.0 |      |
|  | 10 | 26 | 2 | 39 | 2 | 2 | 2.0 |      |
|  | 8  | 28 | 3 | 38 | 2 | 2 | 2.0 |      |
|  | 8  | 19 | 2 | 42 | 2 | 2 | 2.0 |      |
|  |    |    | 1 | 39 | 2 | 2 | 2.0 |      |
|  | 3  | 25 | 3 | 39 | 2 | 2 | 2.0 |      |
|  | 16 | 42 | 2 | 40 | 2 | 2 | 2.0 |      |
|  | 12 | 35 | 2 | 38 | 2 | 2 | 2.0 |      |
|  | 8  | 23 | 3 | 39 | 2 | 2 | 2.0 |      |
|  | 7  | 15 | 2 | 40 | 2 | 2 | 2.0 |      |
|  | 7  | 26 | 2 | 38 | 2 | 2 | 2.0 |      |
|  | 11 | 23 | 2 | 40 | 2 | 2 | 2.0 |      |
|  | 12 | 27 | 2 | 40 | 2 | 2 | 2.0 |      |
|  | 9  | 27 | 2 | 40 | 2 | 2 | 2.0 |      |
|  |    |    | 3 | 41 | 2 | 2 | 2.0 |      |
|  |    |    | 2 | 40 | 2 | 2 | 2.0 |      |
|  | 34 | 26 | 3 | 38 | 2 | 2 | 2.0 |      |
|  | 6  | 16 | 2 | 37 | 2 | 2 | 2.0 |      |
|  |    |    | 2 | 40 | 2 | 2 | 2.0 | 1    |
|  | 3  | 13 | 3 | 37 | 2 | 2 | 2.0 |      |
|  | 8  | 32 | 3 | 42 | 2 | 2 | 2.0 |      |
|  | 0  | 3  | 2 | 40 | 2 | 2 | 2.0 |      |
|  | 5  | 16 | 2 | 40 | 2 | 2 | 2.0 |      |
|  |    | 19 | 2 | 39 | 2 | 2 | 2.0 |      |
|  | 15 | 21 | 2 | 40 | 2 | 2 | 2.0 |      |
|  | 1  | 12 | 2 | 36 | 2 | 2 | 2.0 |      |
|  | 9  | 26 | 1 | 38 | 2 | 2 | 2.0 |      |
|  | 1  | 12 | 1 | 39 | 2 | 2 | 2.0 |      |
|  | 9  | 23 | 3 | 40 | 2 | 2 | 2.0 |      |
|  | 8  | 23 | 2 | 41 | 2 | 2 | 2.0 |      |
|  | 20 | 27 | 2 | 38 | 2 | 2 | 2.0 |      |
|  | 1  | 10 | 1 | 37 | 2 | 2 | 2.0 |      |
|  | 9  | 35 | 3 | 40 | 2 | 2 | 2.0 |      |
|  | 0  | 10 | 1 | 40 | 2 | 2 | 2.0 |      |
|  | 0  | 7  | 2 | 39 | 2 | 2 | 2.0 |      |
|  | 5  | 22 | 2 | 36 | 2 | 2 | 2.0 |      |
|  | 6  | 18 | 3 | 40 | 2 | 2 | 2.0 |      |
|  | 1  | 14 | 3 | 29 | 2 | 2 | 2.0 |      |
|  | 1  | 11 | 2 | 39 | 2 | 2 | 2.0 |      |
|  | 0  | 10 | 3 | 40 | 2 | 2 | 2.0 |      |
|  | 0  | 17 | 2 | 38 | 2 | 2 | 2.0 |      |
|  | 22 | 37 | 2 | 38 | 2 | 2 | 2.0 |      |
|  | 14 | 23 | 2 | 39 | 2 | 2 | 2.0 |      |
|  | 0  | 9  | 1 | 38 | 2 | 2 | 2.0 |      |
|  | 2  | 15 | 2 | 38 | 2 | 2 | 2.0 |      |
|  | 4  | 21 | 2 | 40 | 2 | 2 | 2.0 |      |
|  | 10 | 25 | 2 | 39 | 2 | 2 | 2.0 |      |
|  |    |    | 1 | 40 | 2 | 2 | 2.0 |      |
|  | 9  | 25 | 3 | 39 | 2 | 2 | 2.0 |      |
|  | 5  | 8  | 2 | 39 | 2 | 2 | 2.0 |      |
|  | 1  | 10 | 2 | 40 | 2 | 2 | 2.0 |      |
|  | 3  | 20 | 2 | 38 | 2 | 2 | 2.0 |      |
|  | 12 | 26 | 2 | 40 | 2 | 2 | 2.0 |      |
|  | 12 | 26 | 3 | 37 | 2 | 2 | 2.0 |      |
|  | 3  | 17 | 3 | 42 | 2 | 2 | 2.0 | 1 あり |
|  |    |    | 2 | 40 | 2 | 2 | 2.0 |      |

|     |    |    |   |    |   |   |     |
|-----|----|----|---|----|---|---|-----|
|     |    |    | 2 | 40 | 2 | 2 | 2.0 |
|     |    |    | 2 | 40 | 2 | 2 | 2.0 |
|     | 1  | 10 | 1 | 38 | 2 | 2 | 2.0 |
|     | 0  | 7  | 2 | 40 | 2 | 2 | 2.0 |
|     |    |    | 2 | 39 | 2 | 2 | 2.0 |
|     | 1  | 13 | 2 | 38 | 2 | 2 | 2.0 |
|     | 2  | 19 | 2 | 39 | 2 | 2 | 2.0 |
|     | 1  | 12 | 2 | 38 | 2 | 2 | 2.0 |
| 485 | 10 | 30 | 2 | 39 | 2 | 2 | 2.0 |
|     |    |    | 2 | 40 | 2 | 2 | 2.0 |
|     |    |    | 2 | 39 | 2 | 2 | 2.0 |
|     | 6  | 21 | 2 | 41 | 2 | 2 | 2.0 |
|     | 1  | 10 | 2 | 39 | 2 | 2 | 2.0 |
|     | 6  | 30 | 2 | 39 | 2 | 2 | 2.0 |
|     | 3  | 11 | 2 | 38 | 2 | 2 | 2.0 |
|     | 6  | 20 | 2 | 39 | 2 | 2 | 2.0 |
|     |    |    | 3 | 40 | 2 | 2 | 2.0 |
|     | 7  | 23 |   | 41 | 2 | 2 | 2.0 |
|     | 7  | 19 | 2 | 37 | 2 | 2 | 2.0 |
|     | 15 | 27 | 2 | 39 | 2 | 2 | 2.0 |
|     | 0  | 15 |   | 38 | 2 | 2 | 2.0 |
|     | 21 | 30 | 3 | 38 | 2 | 2 | 2.0 |
|     | 12 | 24 | 2 | 37 | 2 | 2 | 2.0 |
|     | 12 | 24 | 2 | 37 | 2 | 2 | 2.0 |
|     | 2  | 11 | 3 | 39 | 2 | 2 | 2.0 |
|     | 2  | 14 | 1 | 39 | 2 | 2 | 2.0 |
|     | 14 | 36 | 2 | 38 | 2 | 2 | 2.0 |
|     | 6  | 16 | 2 | 40 | 2 | 2 | 2.0 |
|     | 0  | 10 | 2 | 38 | 2 | 2 | 2.0 |

| agemother |           |           |        |
|-----------|-----------|-----------|--------|
| smoking   | agemother | dustclass | dustno |
| 1         | 26        | 0         | 0      |
| 1         | 34        | 0         | 0      |
| 2         | 30        | 0         | 0      |
| 1         | 41        | 0         | 0      |
| 1         | 36        | 0         | 0      |
| 2         | 30        | 0         | 0      |
| 2         |           | 0         | 0      |
| 2         |           | 0         | 0      |
| 2         | 24        | 4         | 33.75  |
| 2         | 31        | 2         | 3.11   |
| 1         |           | 0         | 0      |
| 1         | 32        | 0         | 0      |
| 2         | 32        | 0         | 0      |
| 2         | 33        | 0         | 0      |
| 1         | 29        | 0         | 0      |
| 2         | 33        | 6         | 100    |
| 1         | 37        | 0         | 0      |
| 1         | 33        | 0         | 0      |
| 2         | 33        | 0         | 0      |
| 1         | 43        | 0         | 0      |
| 1         | 28        | 2         | 1.26   |
| 1         |           | 0         | 0      |
| 1         | 23        | 0         | 0      |
| 2         | 33        | 0         | 0      |
| 2         |           | 5         | 68.8   |
| 1         |           | 3         | 3.83   |
| 2         | 33        | 0         | 0      |
| 1         | 34        | 2         | 0.99   |
| 2         |           | 0         | 0      |
| 1         | 30        | 0         | 0      |
| 2         | 37        | 0         | 0      |
| 2         | 32        | 0         | 0      |
| 2         |           | 0         | 0      |
| 2         | 37        | 0         | 0      |
| 1         | 34        | 0         | 0      |
| 1         | 33        | 6         | 100    |
| 1         | 40        | 0         | 0      |
| 1         | 26        | 3         | 6.44   |
| 1         | 22        | 0         | 0      |
| 2         | 22        | 0         | 0      |
| 1         | 29        | 0         | 0      |
| 2         | 28        | 0         | 0      |
| 1         | 29        | 0         | 0      |
| 2         | 29        | 3         | 6.27   |
| 1         | 33        | 0         | 0      |
| 1         | 28        | 0         | 0      |
| 1         | 33        | 0         | 0      |
| 2         |           | 5         | 97.1   |
| 1         |           | 0         | 0      |
| 1         | 31        | 0         | 0      |
| 2         | 37        | 0         | 0      |
| 1         | 28        | 0         | 0      |
| 2         | 30        | 0         | 0      |
| 2         |           | 0         | 0      |
| 2         | 30        | 0         | 0      |

|   |    |   |      |
|---|----|---|------|
| 2 | 30 | 0 | 0    |
| 2 | 30 | 0 | 0    |
| 1 | 43 | 0 | 0    |
| 1 | 35 | 0 | 0    |
| 1 | 36 | 0 | 0    |
| 1 |    | 0 | 0    |
| 1 |    | 0 | 0    |
| 2 |    | 1 | 0.59 |
| 2 | 30 | 3 | 13.3 |
| 2 | 41 | 0 | 0    |
| 2 | 34 | 5 | 52.4 |
| 2 | 34 | 0 | 0    |
| 1 | 29 | 0 | 0    |
| 2 | 35 | 0 | 0    |
| 1 | 32 | 1 | 0.48 |
| 2 |    | 1 | 0.6  |
| 2 | 36 | 0 | 0    |
| 2 |    | 0 | 0    |
| 2 |    |   |      |
| 1 |    | 0 | 0    |
| 1 |    | 0 | 0    |
| 2 | 30 | 6 | 100  |
| 2 | 30 |   |      |
| 2 | 36 | 5 | 72   |
| 1 | 36 | 4 | 21.7 |
| 1 |    | 0 | 0    |
| 1 | 31 | 4 | 20.9 |
| 1 | 39 | 4 | 38.7 |
| 1 | 30 | 5 | 57.8 |
| 1 |    | 0 | 0    |
| 1 | 30 | 0 | 0    |
| 1 | 31 | 0 | 0    |
| 1 | 26 | 0 | 0    |
| 1 |    | 0 | 0    |
| 1 |    | 0 | 0    |
| 1 | 32 | 0 | 0    |
| 2 | 33 | 5 | 50.5 |
| 2 |    | 0 | 0    |
| 1 | 30 | 0 | 0    |
| 2 |    | 2 | 2.61 |
| 1 |    | 0 | 0    |
| 2 |    | 0 | 0    |
| 1 | 33 |   |      |
| 1 | 30 | 4 | 33.1 |
| 2 | 35 | 0 | 0    |
| 2 | 31 | 0 | 0    |
| 1 |    | 0 | 0    |
| 2 | 31 |   |      |
| 2 |    | 0 | 0    |
| 2 | 32 | 0 | 0    |
| 1 | 36 | 0 | 0    |
| 1 | 32 | 0 | 0    |
| 1 | 29 | 1 | 0.99 |
| 2 | 29 | 0 | 0    |
| 1 |    | 0 | 0    |
| 1 | 40 | 4 | 31.9 |
| 1 |    | 0 | 0    |
| 1 | 26 | 0 | 0    |
| 1 | 26 |   |      |

|   |    |   |      |
|---|----|---|------|
| 1 | 30 |   |      |
| 1 | 29 | 0 | 0    |
| 1 | 39 |   |      |
| 2 | 31 | 2 | 1.86 |
| 2 |    | 0 | 0    |
| 1 | 32 | 0 | 0    |
| 2 | 33 | 0 | 0    |
| 2 | 30 | 0 | 0    |
| 2 | 31 | 0 | 0    |
| 1 | 35 | 2 | 0.88 |
| 2 | 26 | 2 | 1.25 |
| 2 | 29 | 0 | 0    |
| 2 | 25 | 0 | 0    |
| 2 | 28 | 6 | 100  |
| 1 |    | 0 | 0    |
| 1 |    | 0 | 0    |
| 1 | 30 | 0 | 0    |
| 2 | 22 | 0 | 0    |
| 2 |    | 0 | 0    |
| 1 | 30 | 0 | 0    |
| 1 | 35 | 0 | 0    |
| 1 | 33 | 0 | 0    |
| 2 | 30 | 0 | 0    |
| 2 |    | 0 | 0    |
| 2 | 30 | 0 | 0    |
| 1 | 30 | 0 | 0    |
| 1 | 30 | 0 | 0    |
| 2 | 30 | 0 | 0    |
| 2 | 27 | 0 | 0    |
| 2 | 32 | 0 | 0    |
| 2 | 33 | 0 | 0    |
| 2 | 30 | 4 | 17.7 |
| 2 | 34 | 0 | 0    |
| 1 | 25 | 5 | 10.3 |
| 2 | 30 | 0 | 0    |
| 2 | 30 | 2 | 1.71 |
| 1 | 37 | 0 | 0    |
| 2 | 25 | 0 | 0    |
| 1 | 34 | 0 | 0    |
| 2 | 27 | 6 | 100  |
| 1 | 35 | 0 | 0    |
| 1 | 25 | 0 | 0    |
| 1 | 35 | 0 | 0    |
| 1 | 35 | 0 | 0    |
| 1 | 28 | 0 | 0    |
| 1 | 30 | 0 | 0    |
| 2 | 32 | 0 | 0    |
| 1 |    | 0 | 0    |
| 2 | 35 |   |      |
| 2 | 43 | 4 | 33.7 |
| 2 | 25 |   |      |
| 2 | 29 |   |      |
| 1 | 30 | 0 | 0    |
| 2 | 37 |   |      |
| 1 | 35 | 0 | 0    |
| 1 |    | 0 | 0    |
| 1 |    | 0 | 0    |
| 1 |    | 0 | 0    |
| 2 | 30 |   |      |

|   |    |   |      |
|---|----|---|------|
| 2 | 25 |   |      |
| 2 |    |   |      |
| 1 | 32 | 0 | 0    |
| 1 | 30 | 4 | 19.2 |
| 1 | 30 |   |      |
| 2 | 30 | 0 | 0    |
| 2 |    | 0 | 0    |
| 1 |    | 0 | 0    |
| 2 | 32 | 4 | 30.1 |
| 2 | 30 |   |      |
| 1 | 28 |   |      |
| 2 | 28 | 3 | 17.1 |
| 2 | 27 | 0 | 0    |
| 2 |    | 0 | 0    |
| 1 | 25 | 0 | 0    |
| 2 | 28 | 0 | 0    |
| 1 | 25 | 0 | 0    |
| 1 | 25 | 5 | 33.2 |
| 1 | 31 | 0 | 0    |
| 1 | 35 | 0 | 0    |
| 1 | 35 | 0 | 0    |
| 2 | 33 | 0 | 0    |
| 1 | 25 | 0 | 0    |
| 1 | 22 | 0 | 0    |
| 2 | 25 | 0 | 0    |
| 1 | 25 | 0 | 0    |
| 1 | 30 | 0 | 0    |
| 1 |    | 0 | 0    |
| 2 |    | 0 | 0    |























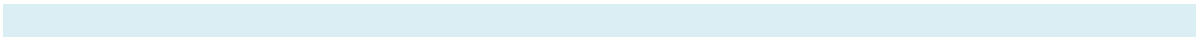

Supplement: Tsuji.zip [file Tsuji.zip]
